# Supplementary material for: A cell-based evaluation of a non-essential amino acid formulation as a non-bioactive control for activation and stimulation of muscle protein synthesis using ex vivo human serum
Source: PubMed Central journal article supplement (PMC6863517; doi:10.1371/journal.pone.0220757), 2019-11-19
Supplement: pone.0220757.s001.pdf [file pone.0220757.s001.pdf]

**Title:** A cell-based evaluation of a non-essential amino acid formulation as a non-bioactive control for activation and stimulation of muscle protein synthesis using *ex vivo* human serum

**Authors:** Bijal Patel<sup>a,b,c</sup>, Martina Pauk<sup>a,b,c</sup>, Miryam Amigo-Benavent<sup>a,b,c,d</sup>, Alice B. Nongonierma<sup>a,e</sup>, Richard J. Fitzgerald<sup>a,e</sup>, Philip M. Jakeman<sup>a,b,c,d</sup>, Brian P. Carson<sup>a,b,c,d</sup>.

**Original Western Blot Images**

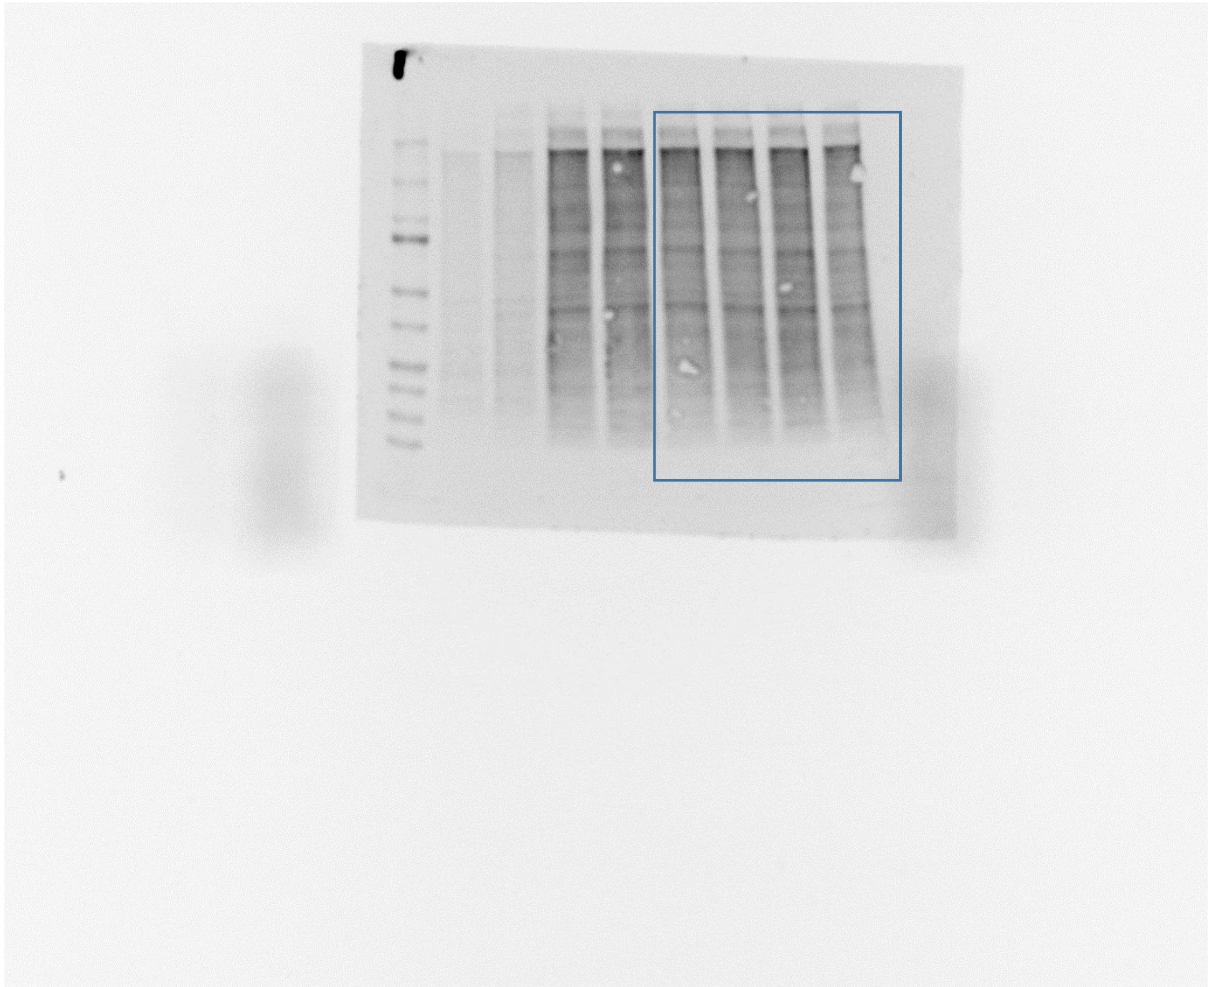

**Puromycin Participant 1**

Lane 5 – WPH FAST

Lane 6 – WPH Fed

Lane 7 – NEAA FAST

Lane 8 – NEAA Fed

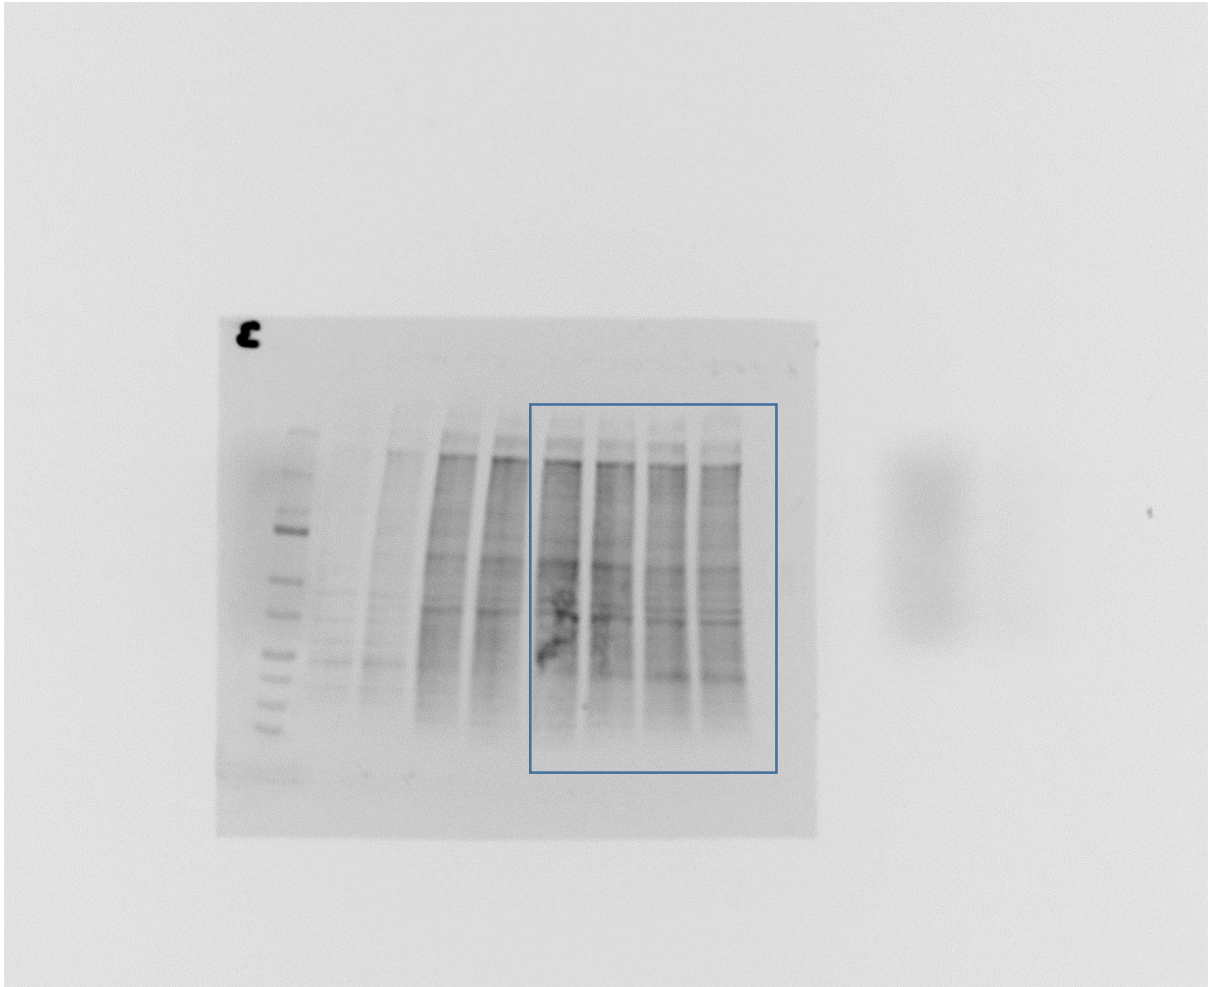

**Puromycin Participant 2**

Lane 5 – WPH FAST

Lane 6 – WPH Fed

Lane 7 – NEAA FAST

Lane 8 – NEAA Fed

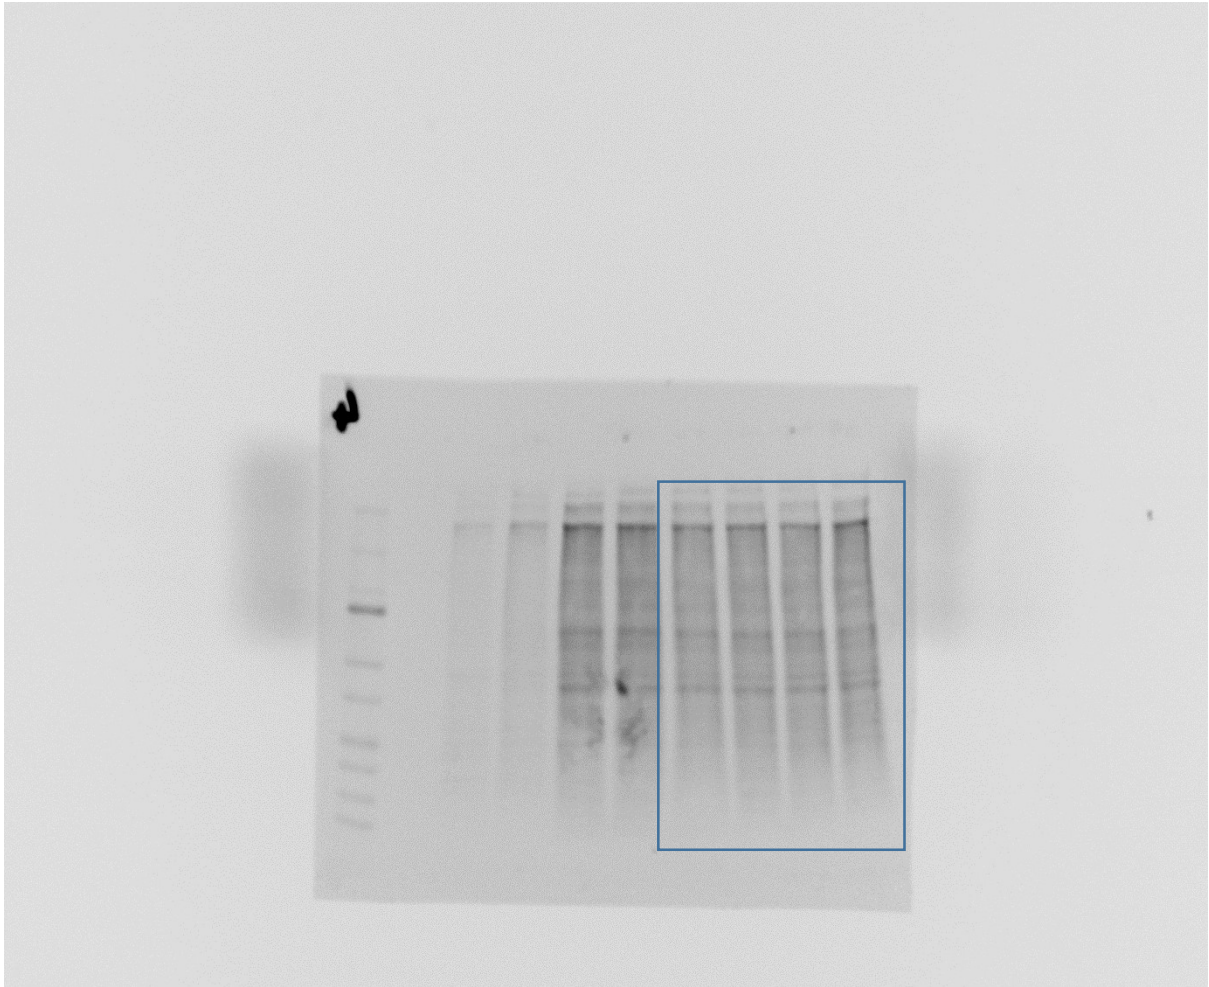

**Puromycin Participant 3**

Lane 5 – WPH FAST

Lane 6 – WPH Fed

Lane 7 – NEAA FAST

Lane 8 – NEAA Fed

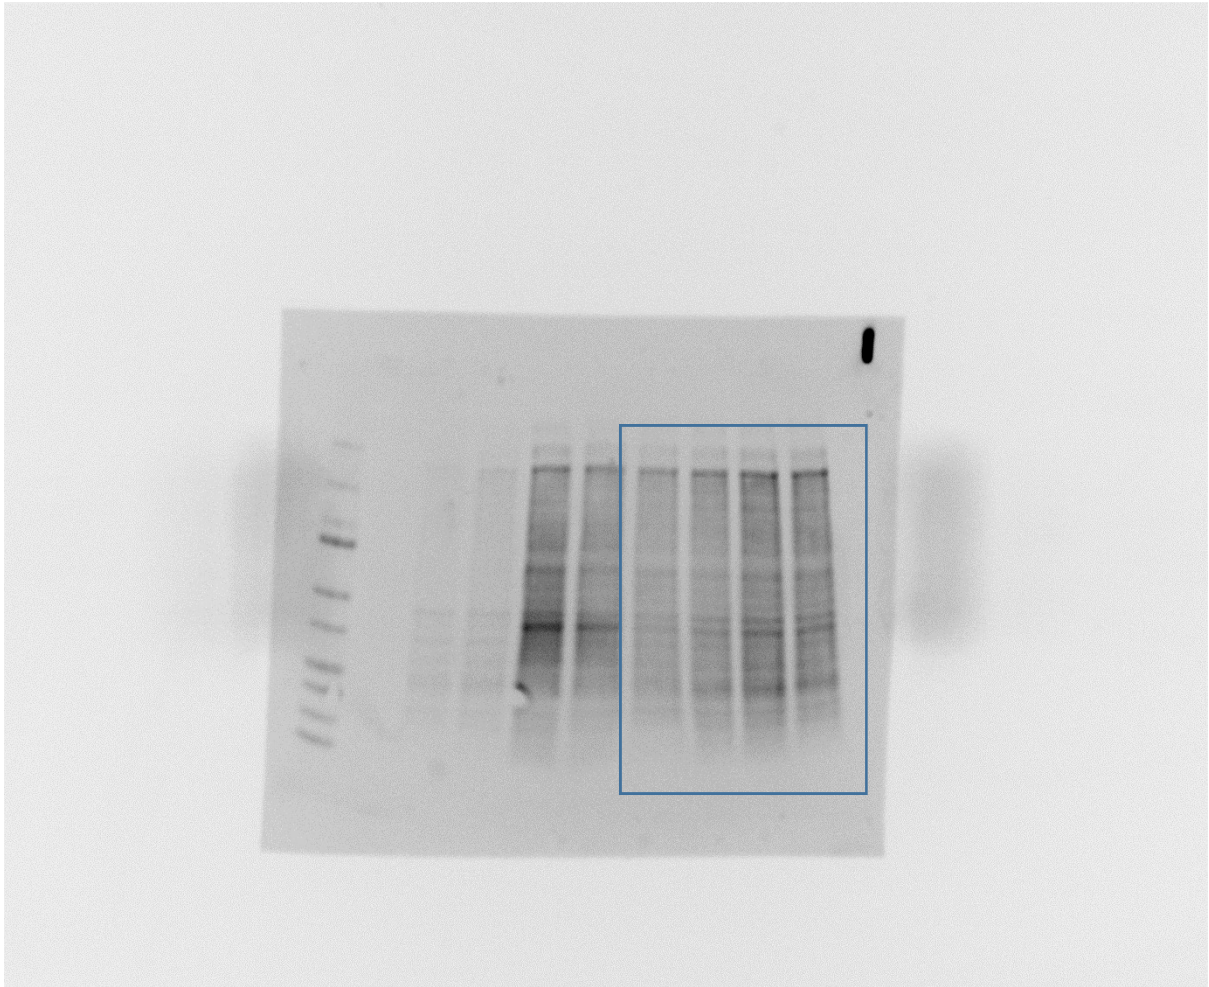

**Puromycin Participant 4**

Lane 5 – WPH FAST

Lane 6 – WPH Fed

Lane 7 – NEAA FAST

Lane 8 – NEAA Fed

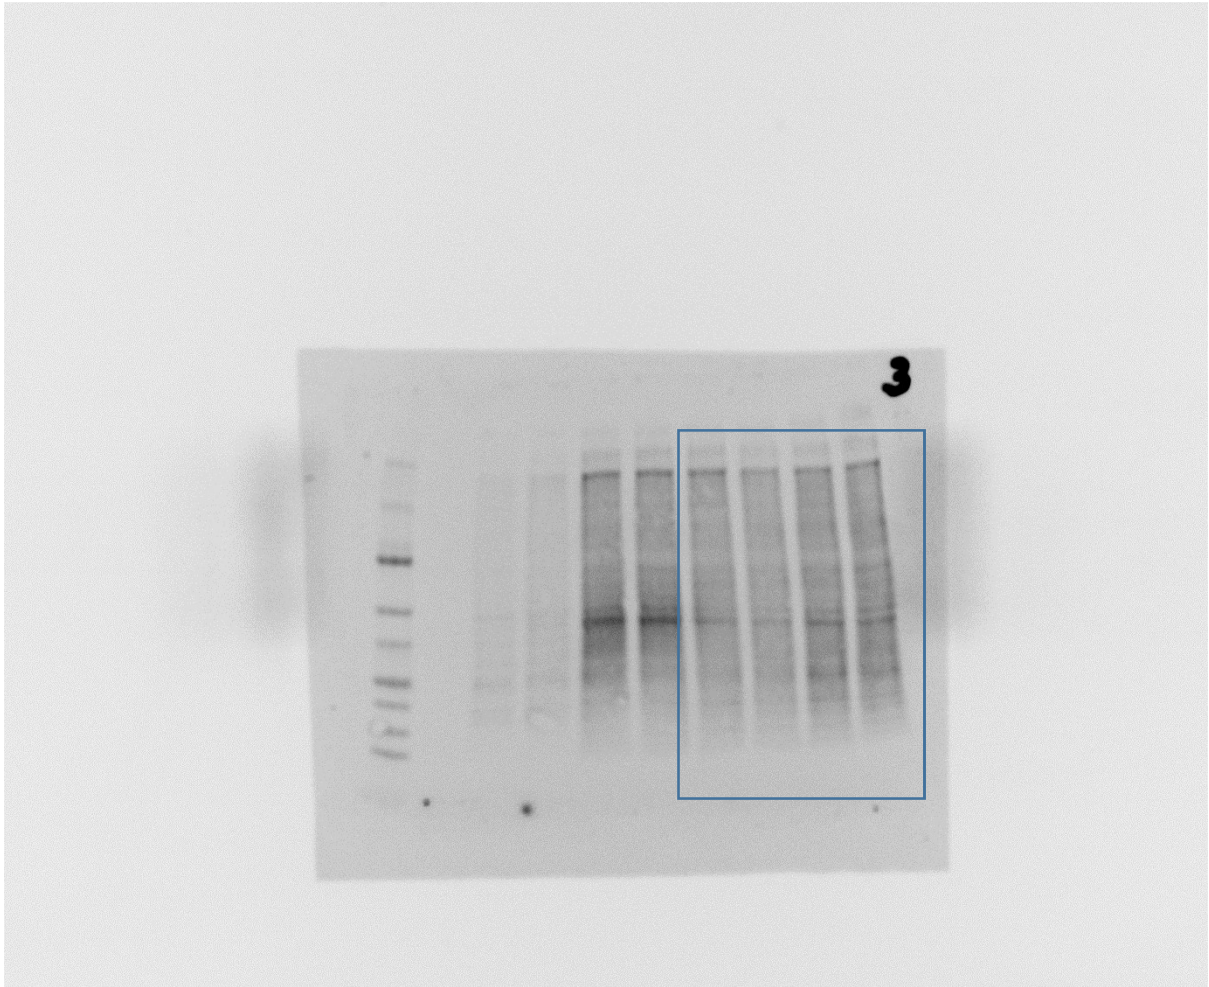

**Puromycin Participant 5**

Lane 5 – WPH FAST

Lane 6 – WPH Fed

Lane 7 – NEAA FAST

Lane 8 – NEAA Fed

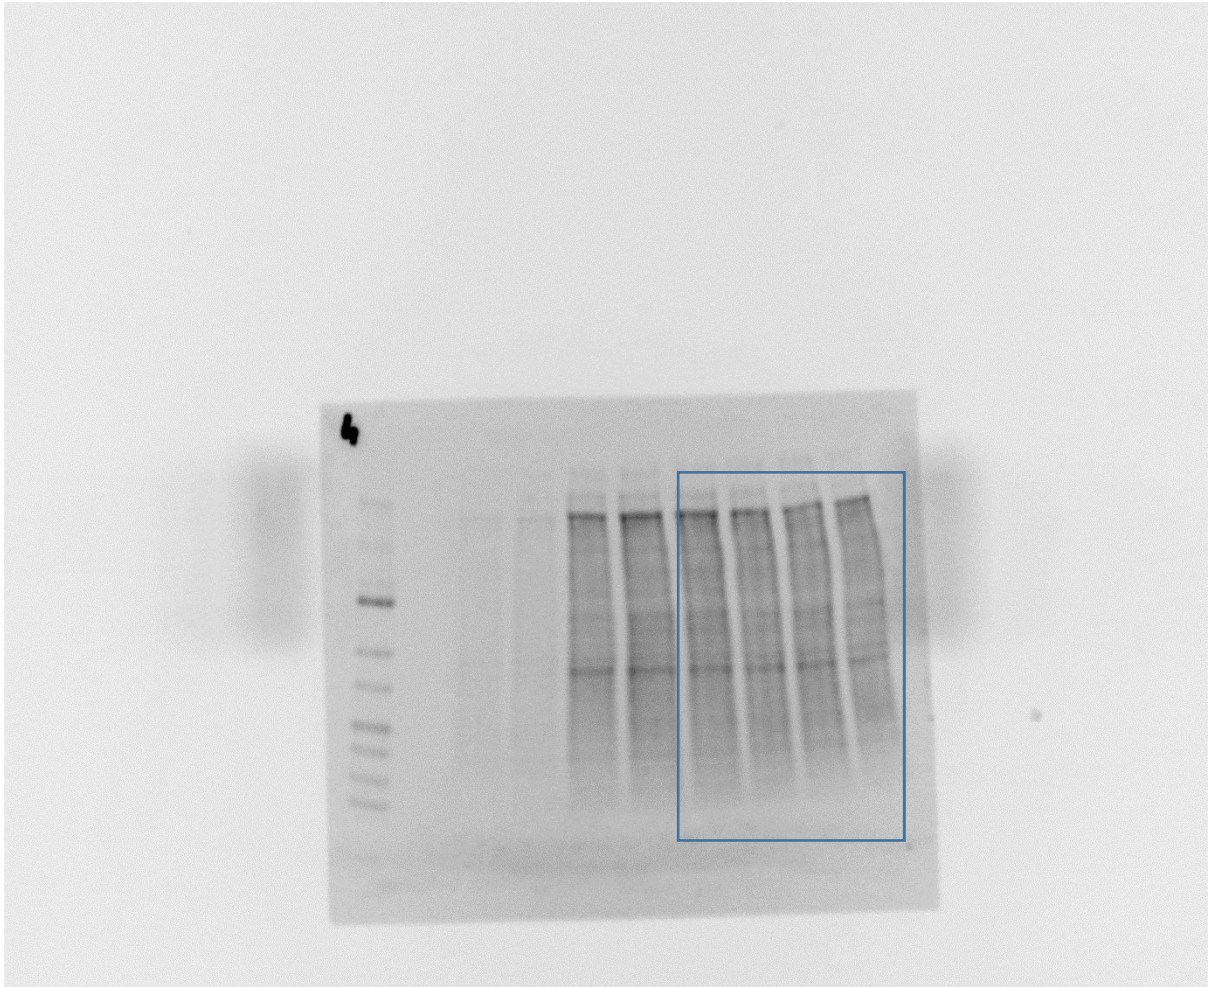

**Puromycin Participant 6**

Lane 5 – WPH FAST

Lane 6 – WPH Fed

Lane 7 – NEAA FAST

Lane 8 – NEAA Fed

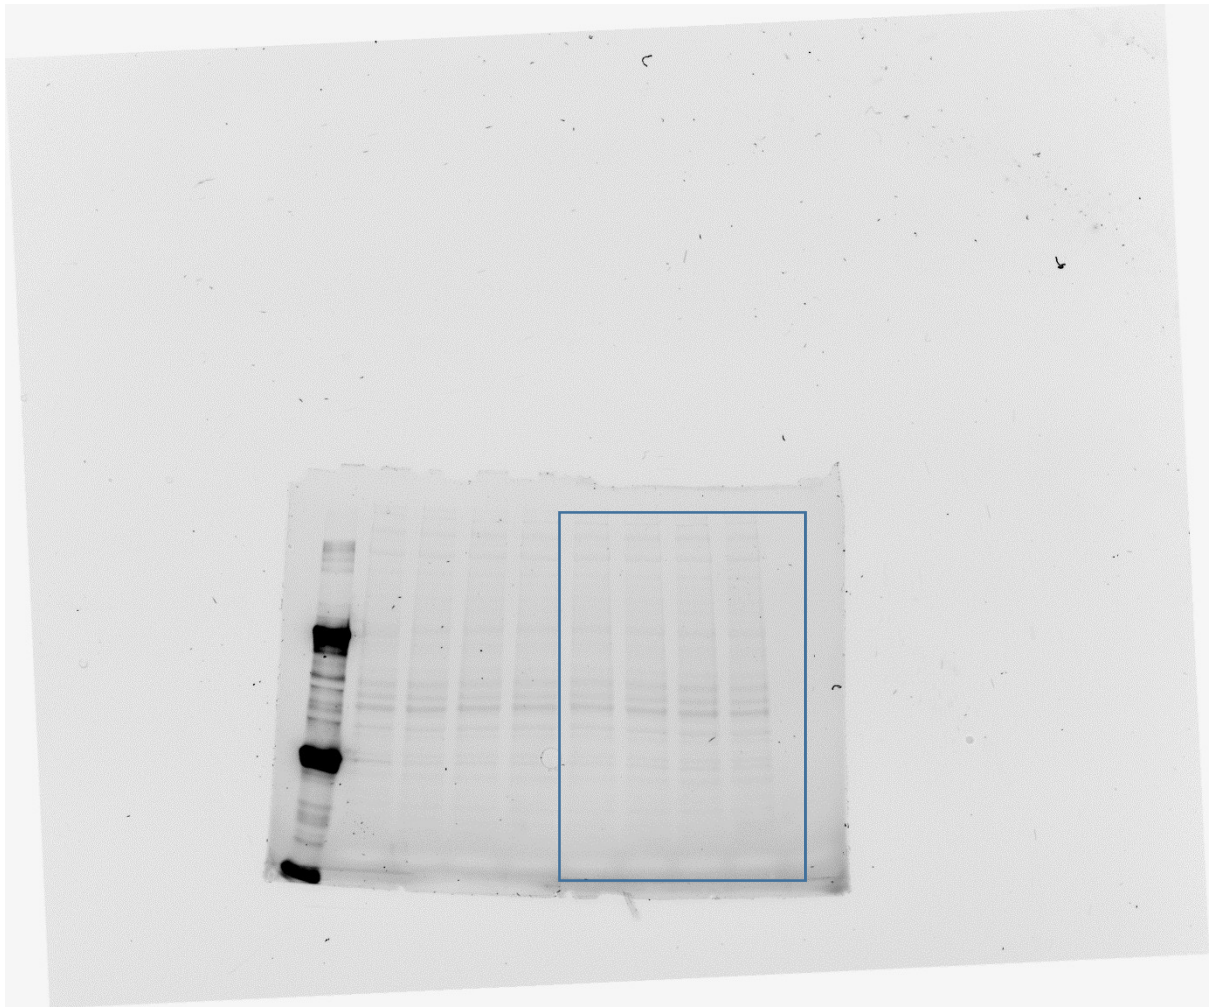

**Total Protein Loading Control Participant 1 (Stain-free activated gel)**

Lane 5 – WPH FAST

Lane 6 – WPH Fed

Lane 7 – NEAA FAST

Lane 8 – NEAA Fed



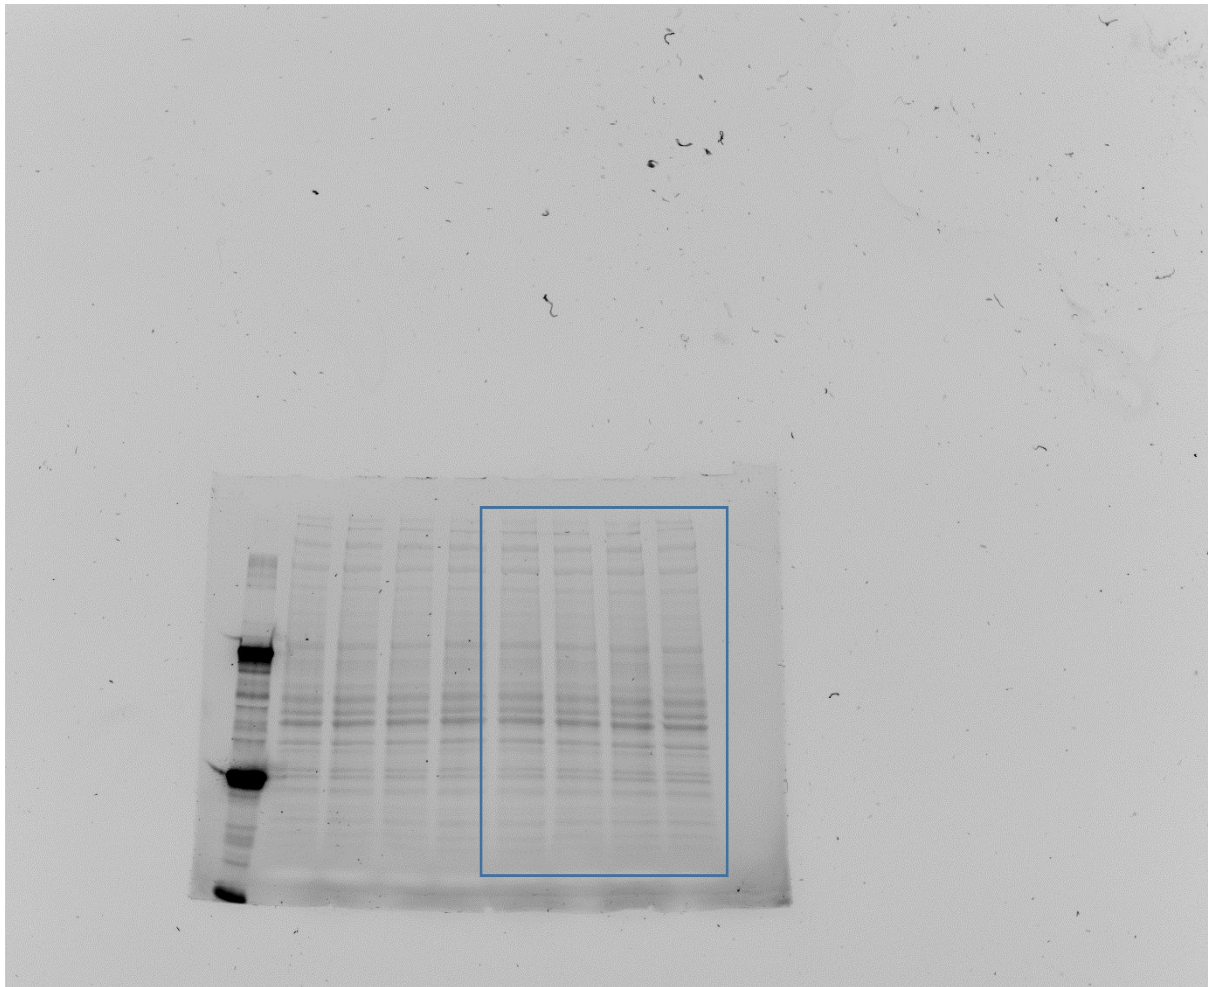

**Total Protein Loading Control Participant 2 (Stain-free activated gel)**

Lane 5 – WPH FAST

Lane 6 – WPH Fed

Lane 7 – NEAA FAST

Lane 8 – NEAA Fed

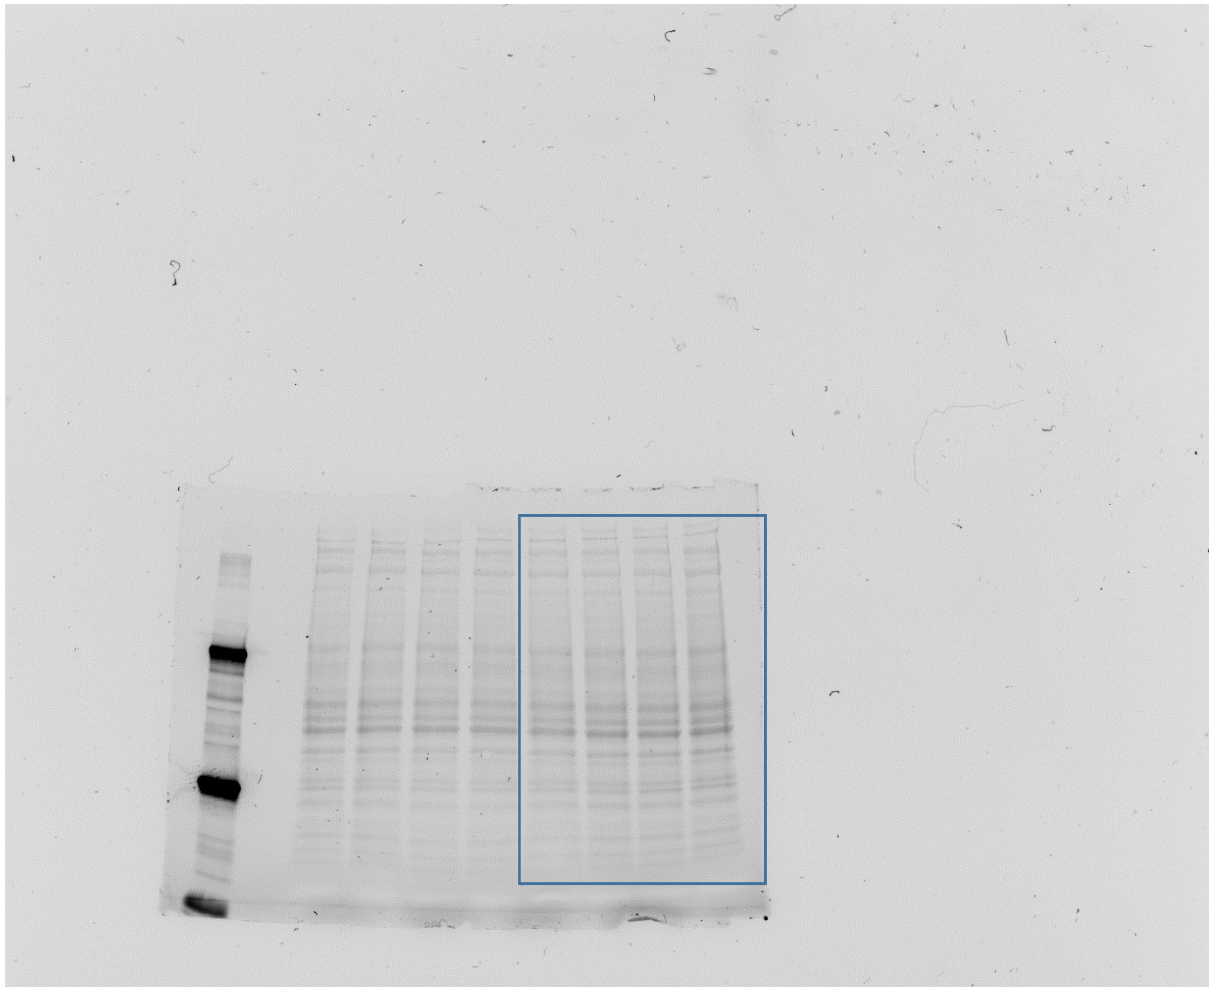

**Total Protein Loading Control Participant 3 (Stain-free activated gel)**

Lane 5 – WPH FAST

Lane 6 – WPH Fed

Lane 7 – NEAA FAST

Lane 8 – NEAA Fed

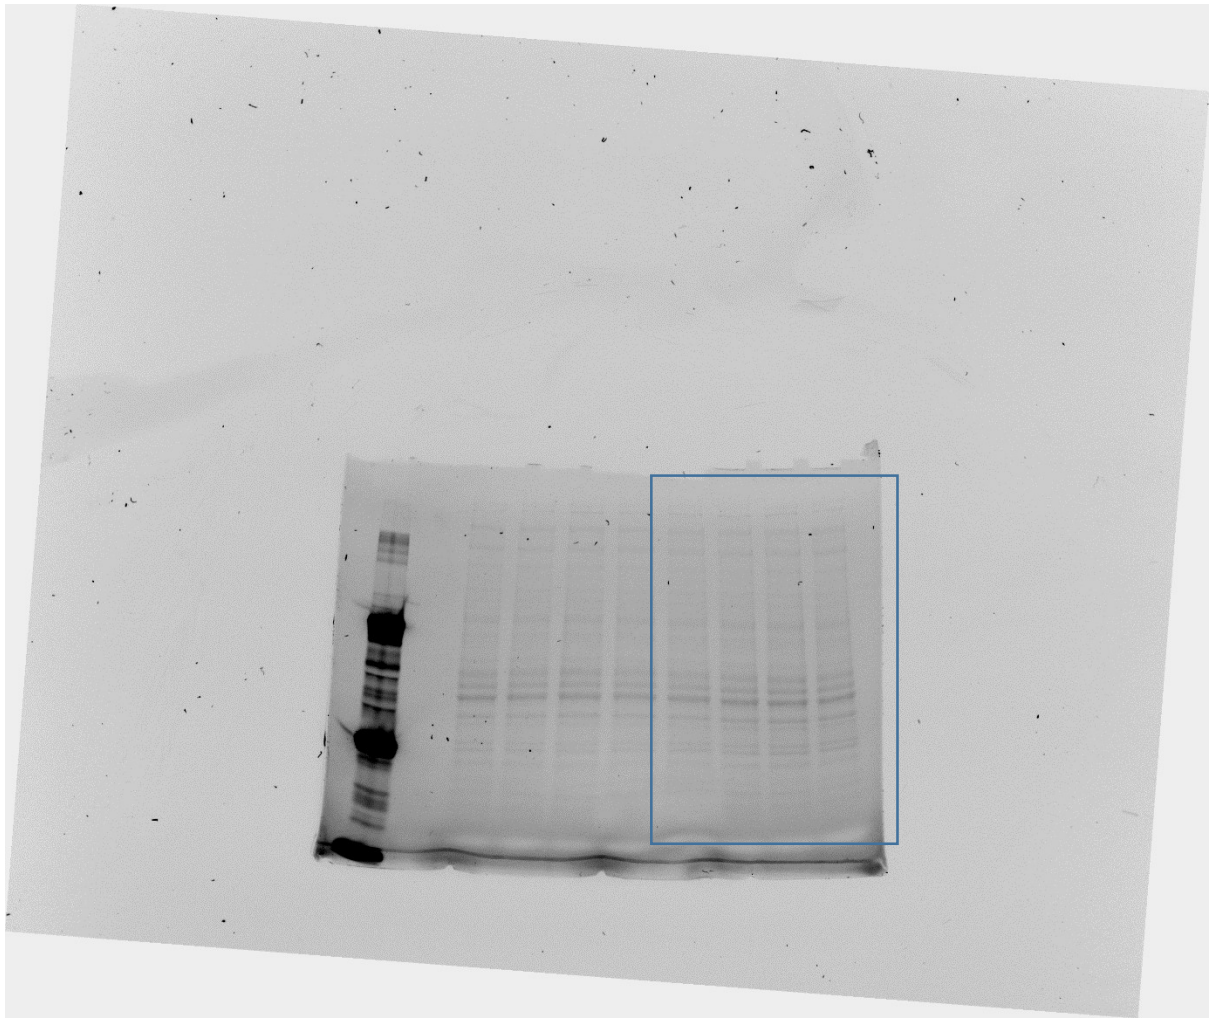

**Total Protein Loading Control Participant 4 (Stain-free activated gel)**

Lane 5 – WPH FAST

Lane 6 – WPH Fed

Lane 7 – NEAA FAST

Lane 8 – NEAA Fed

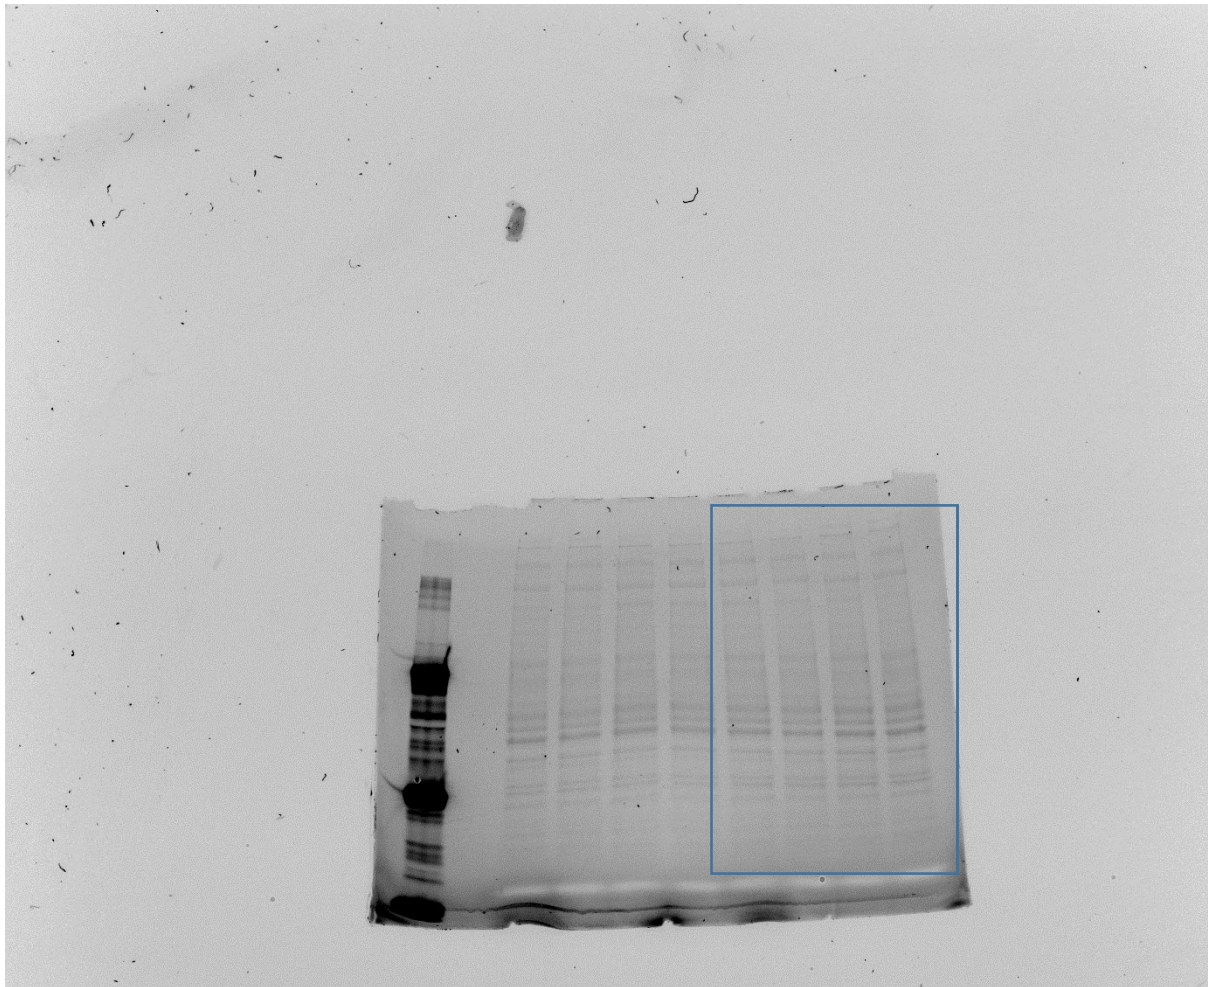

**Total Protein Loading Control Participant 5 (Stain-free activated gel)**

Lane 5 – WPH FAST

Lane 6 – WPH Fed

Lane 7 – NEAA FAST

Lane 8 – NEAA Fed

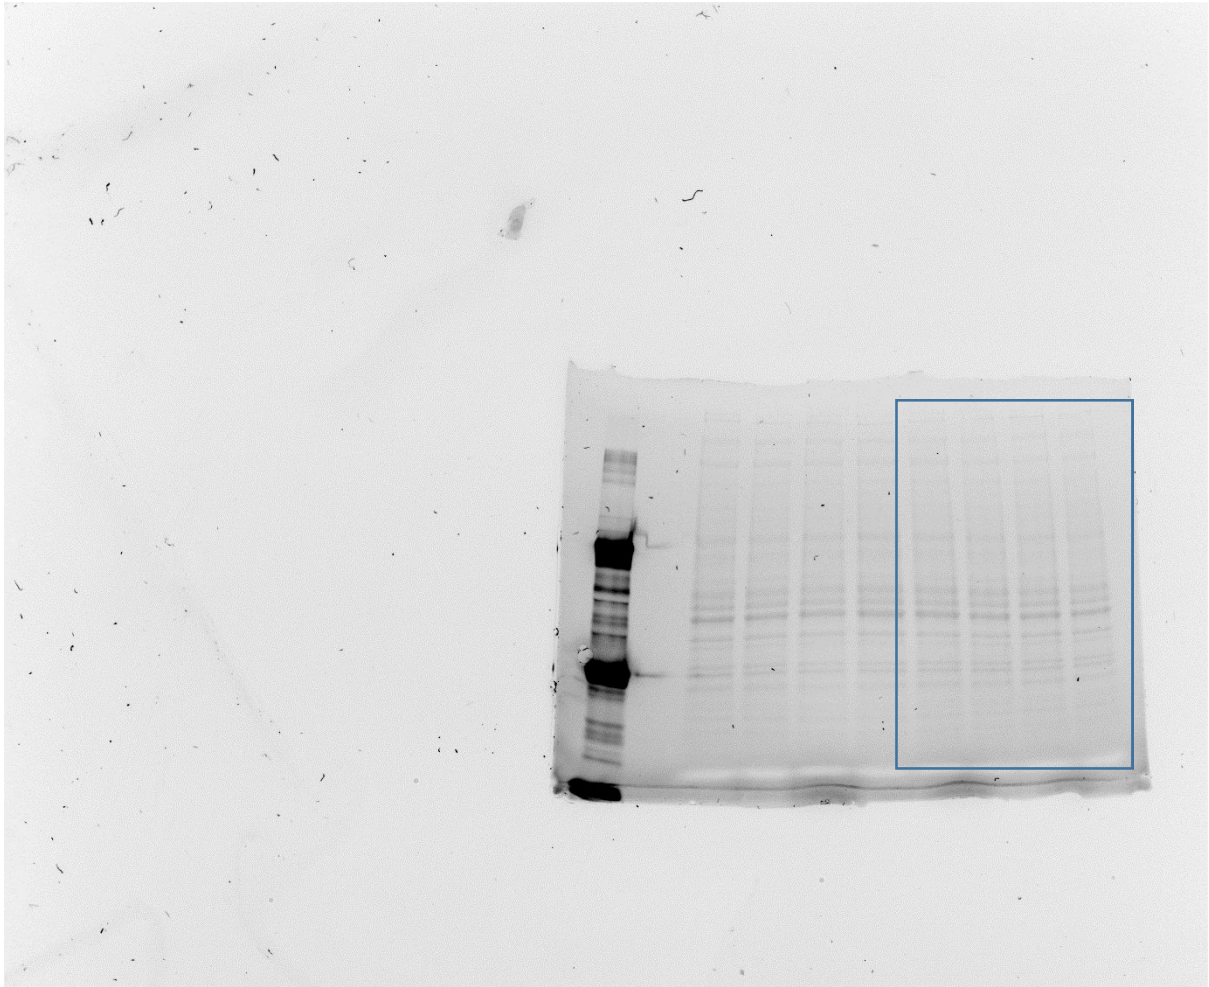

**Total Protein Loading Control Participant 6 (Stain-free activated gel)**

Lane 5 – WPH FAST

Lane 6 – WPH Fed

Lane 7 – NEAA FAST

Lane 8 – NEAA Fed

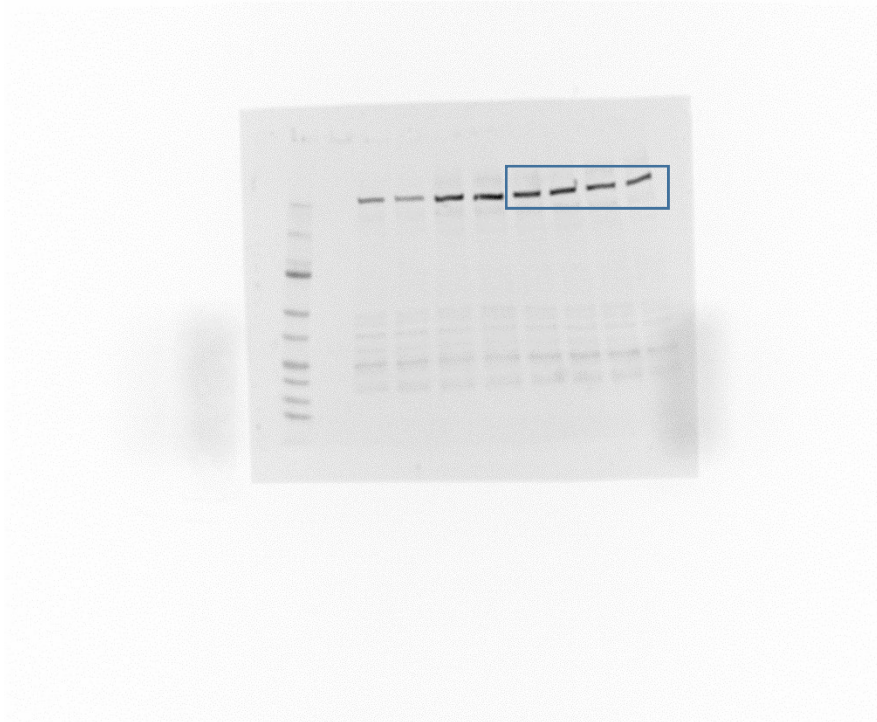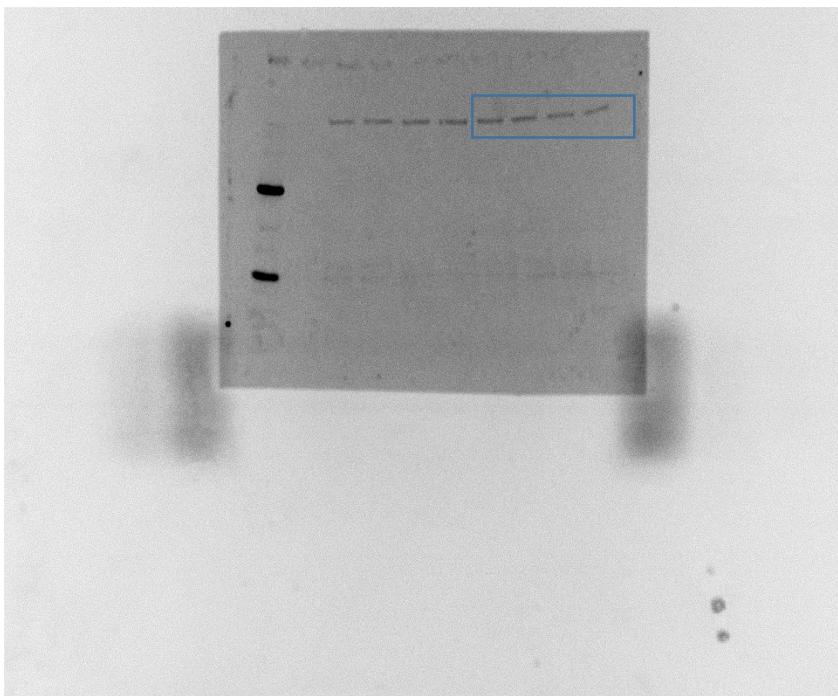

**Phospho (above) and Total (below) mTOR Participant 1**

Lane 5 – WPH FAST

Lane 6 – WPH Fed

Lane 7 – NEAA FAST

Lane 8 – NEAA Fed

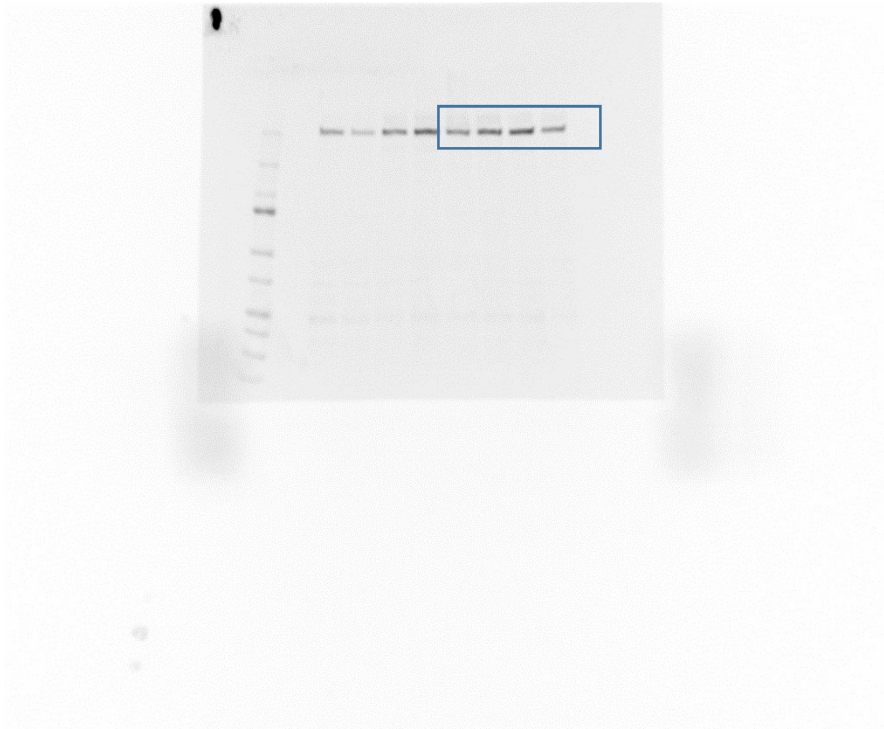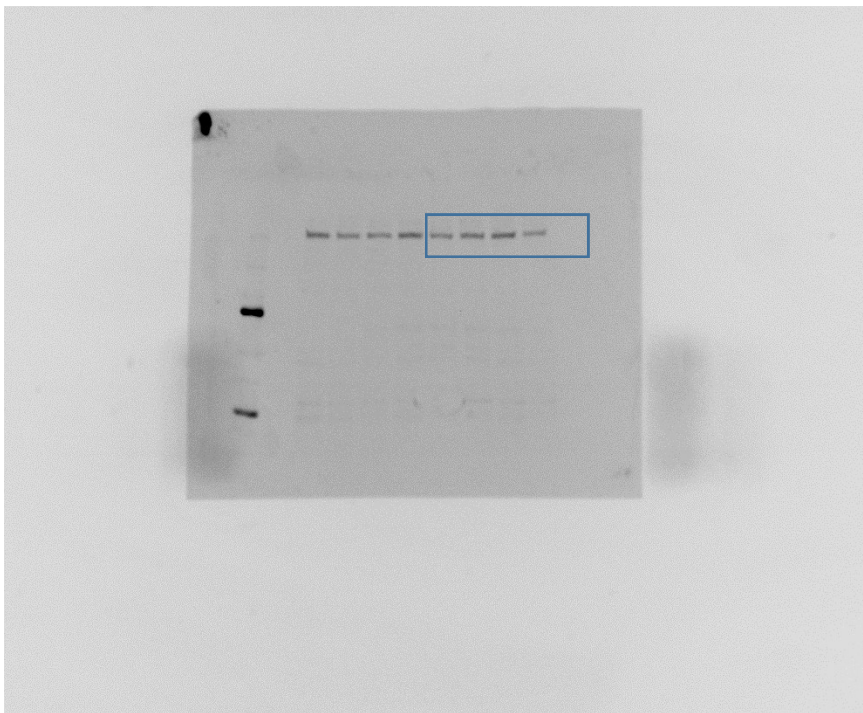

**Phospho (above) and Total (below) mTOR Participant 2**

Lane 5 – WPH FAST

Lane 6 – WPH Fed

Lane 7 – NEAA FAST

Lane 8 – NEAA Fed

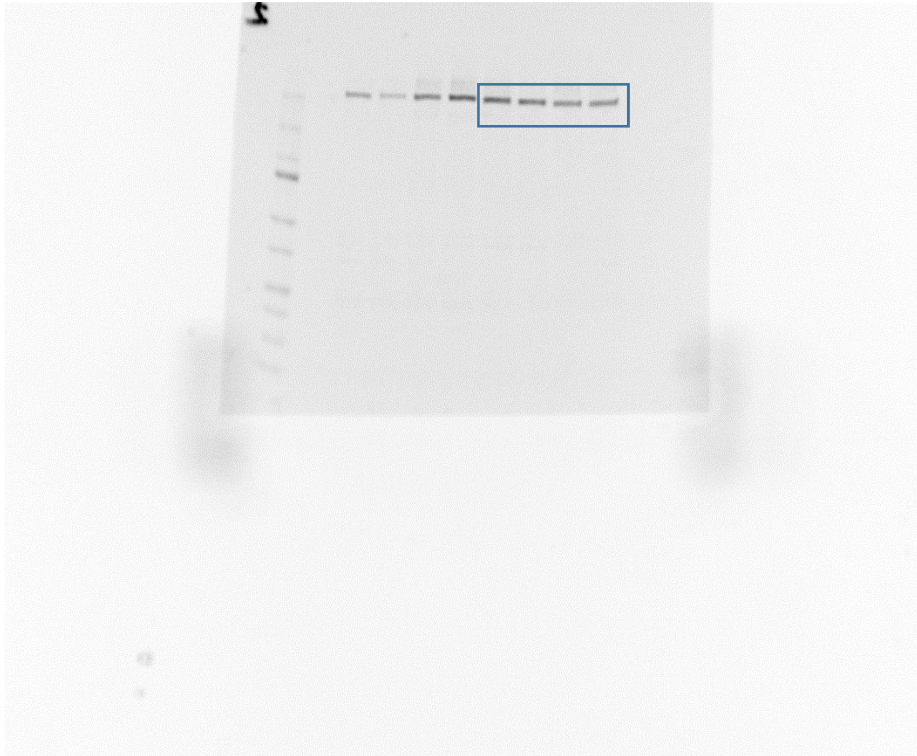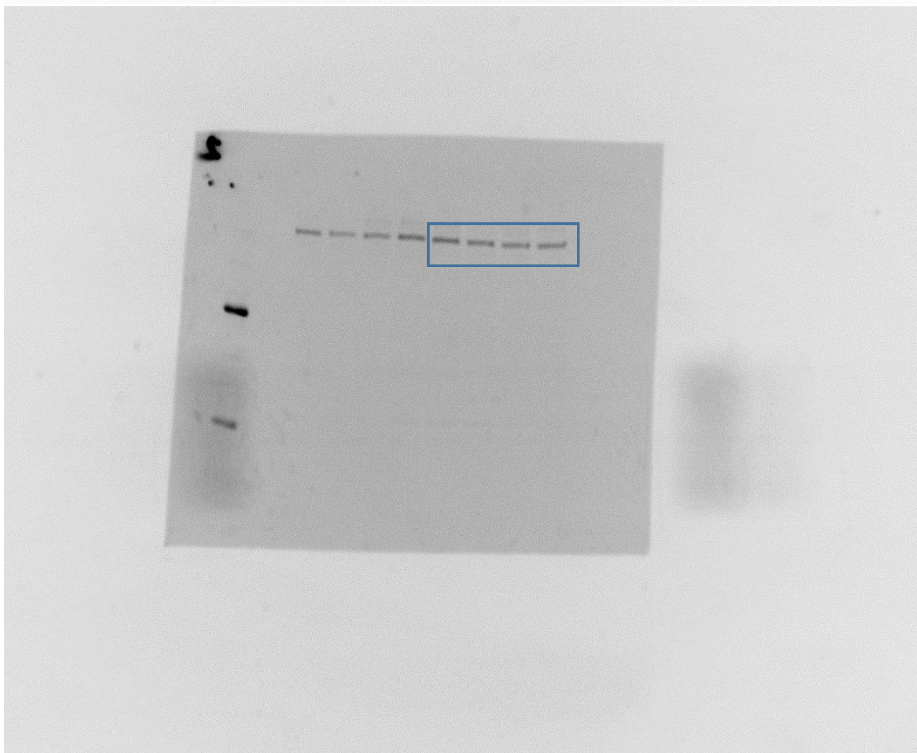

**Phospho (above) and Total (below) mTOR Participant 3**

Lane 5 – WPH FAST

Lane 6 – WPH Fed

Lane 7 – NEAA FAST

Lane 8 – NEAA Fed



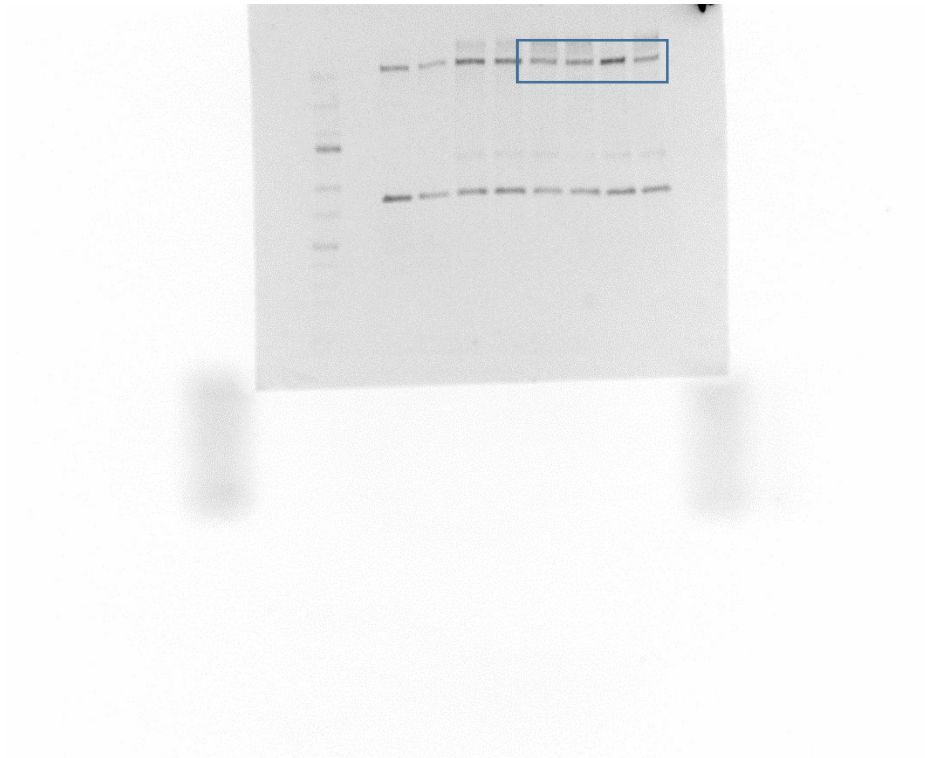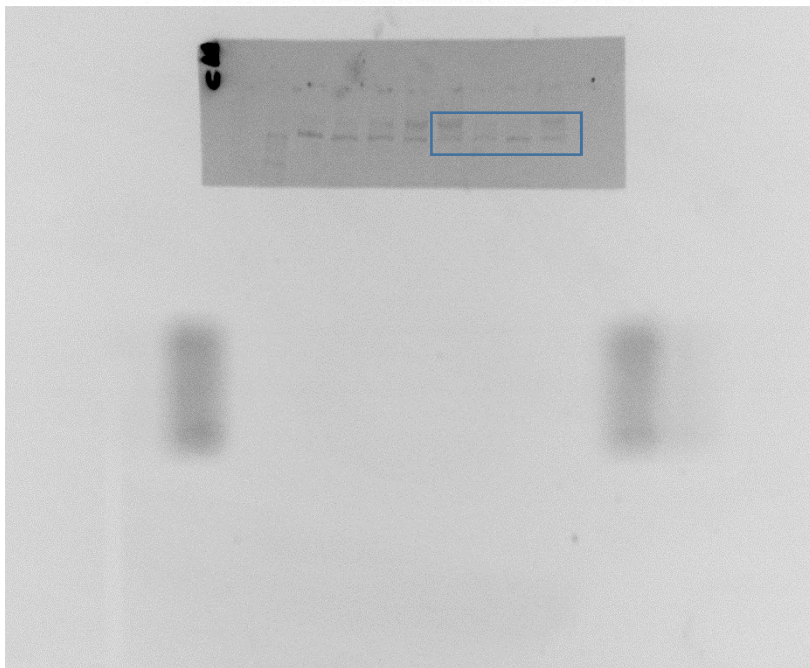

**Phospho (above) and Total (below) mTOR Participant 4**

Lane 5 – WPH FAST

Lane 6 – WPH Fed

Lane 7 – NEAA FAST

Lane 8 – NEAA Fed

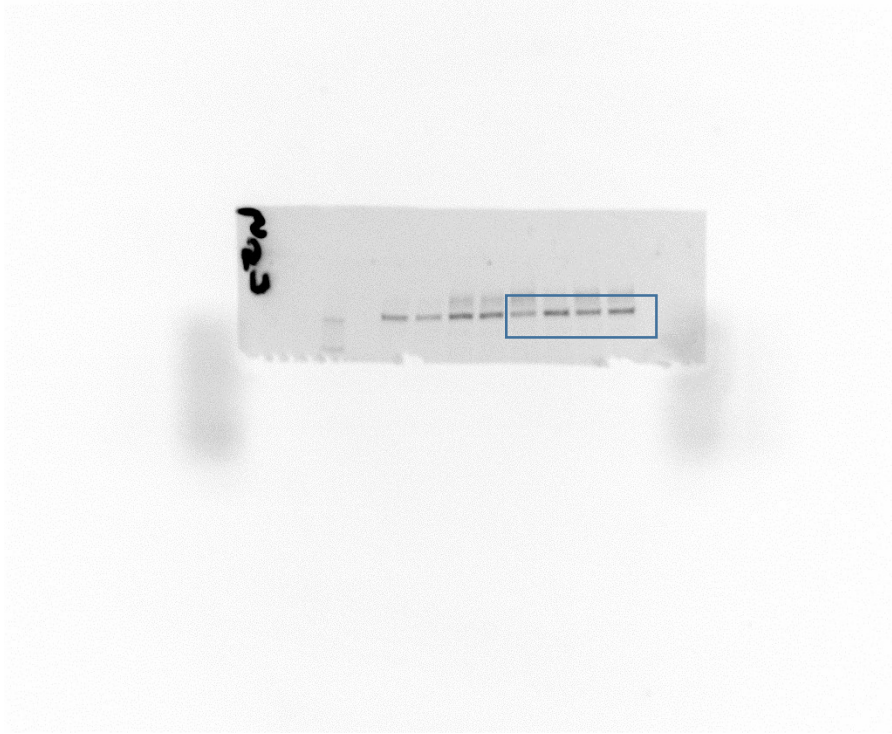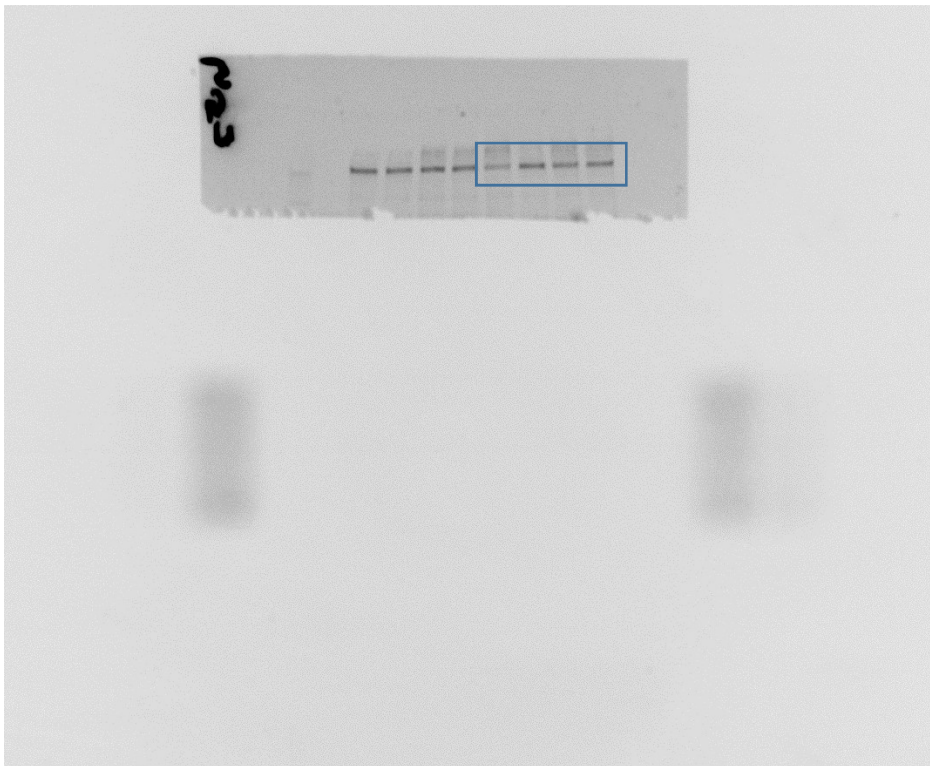

**Phospho (above) and Total (below) mTOR Participant 5**

Lane 5 – WPH FAST

Lane 6 – WPH Fed

Lane 7 – NEAA FAST

Lane 8 – NEAA Fed

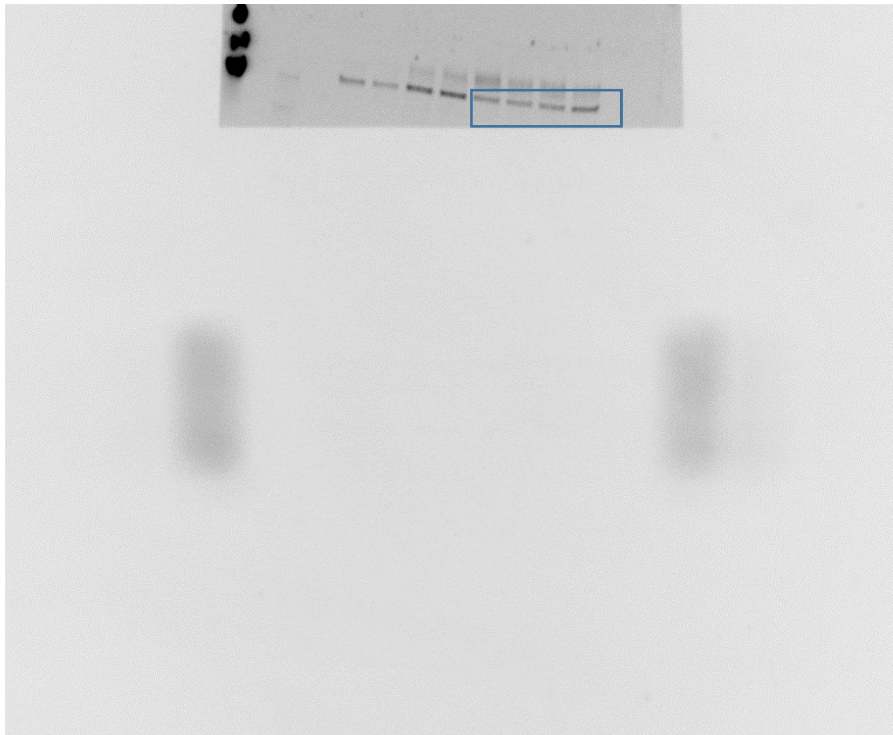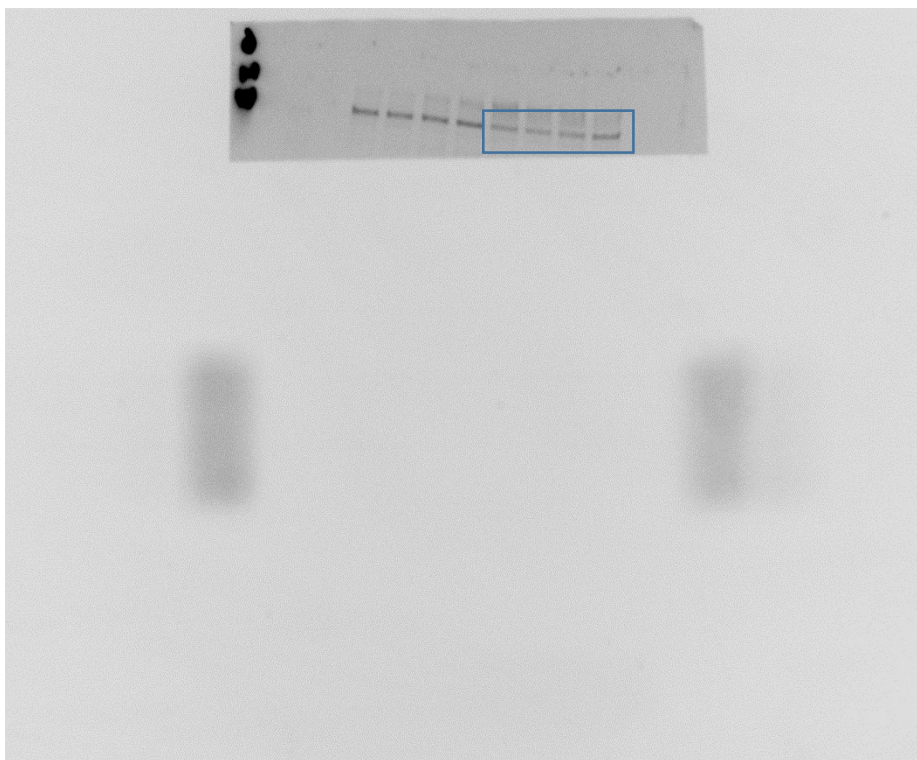

**Phospho (above) and Total (below) mTOR Participant 6**

Lane 5 – WPH FAST

Lane 6 – WPH Fed

Lane 7 – NEAA FAST

Lane 8 – NEAA Fed

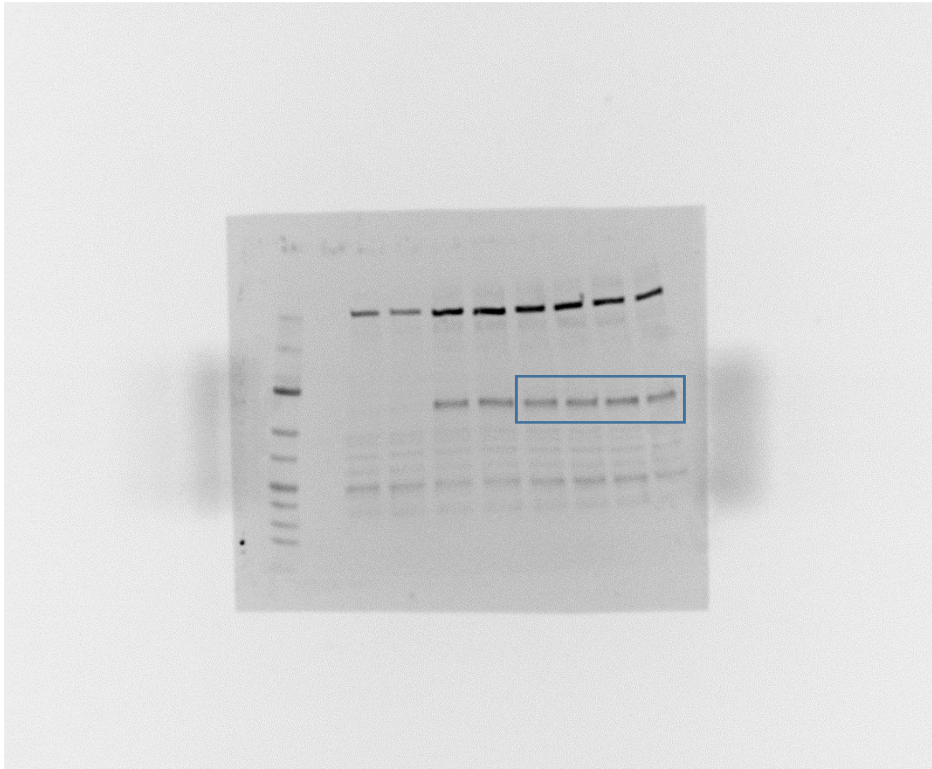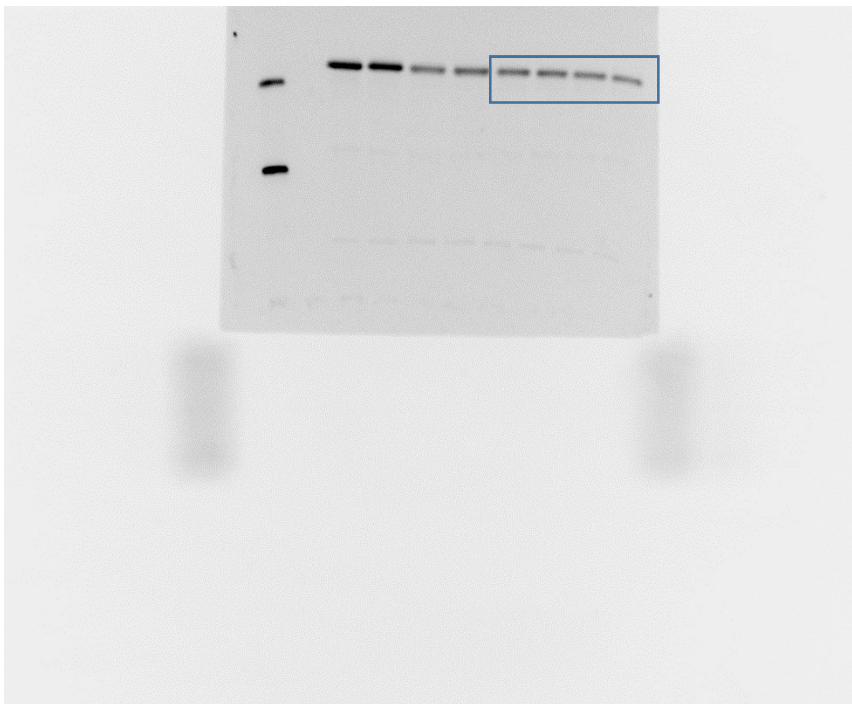

**Phospho (above) and Total (below) P70S6K Participant 1**

Lane 5 – WPH FAST

Lane 6 – WPH Fed

Lane 7 – NEAA FAST

Lane 8 – NEAA Fed

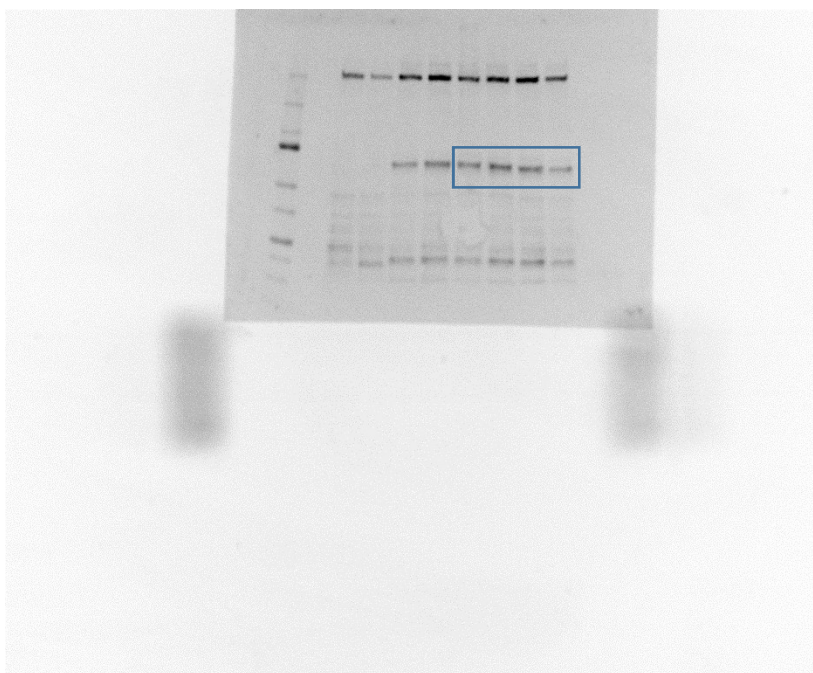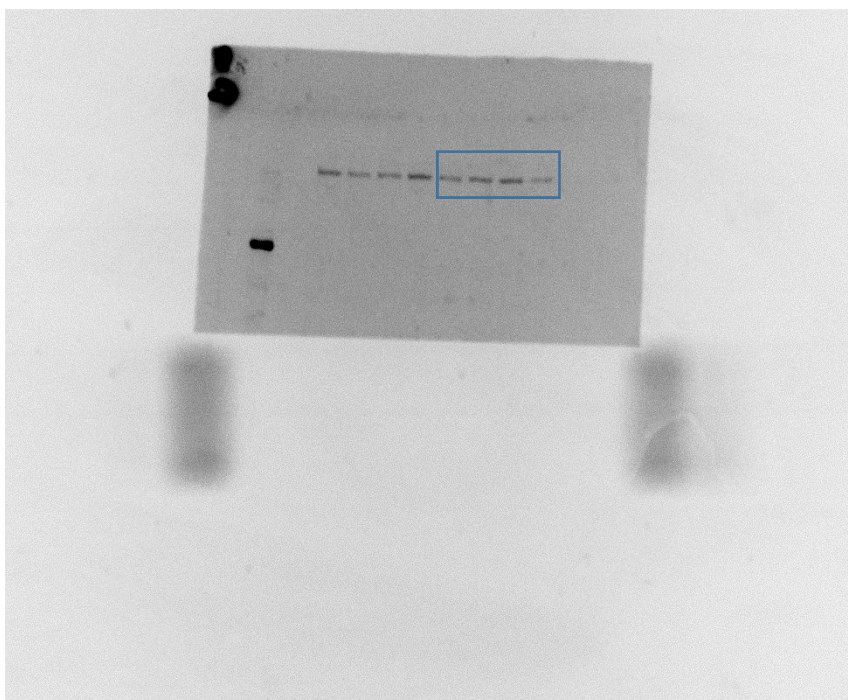

**Phospho (above) and Total (below) P70S6K Participant 2**

Lane 5 – WPH FAST

Lane 6 – WPH Fed

Lane 7 – NEAA FAST

Lane 8 – NEAA Fed

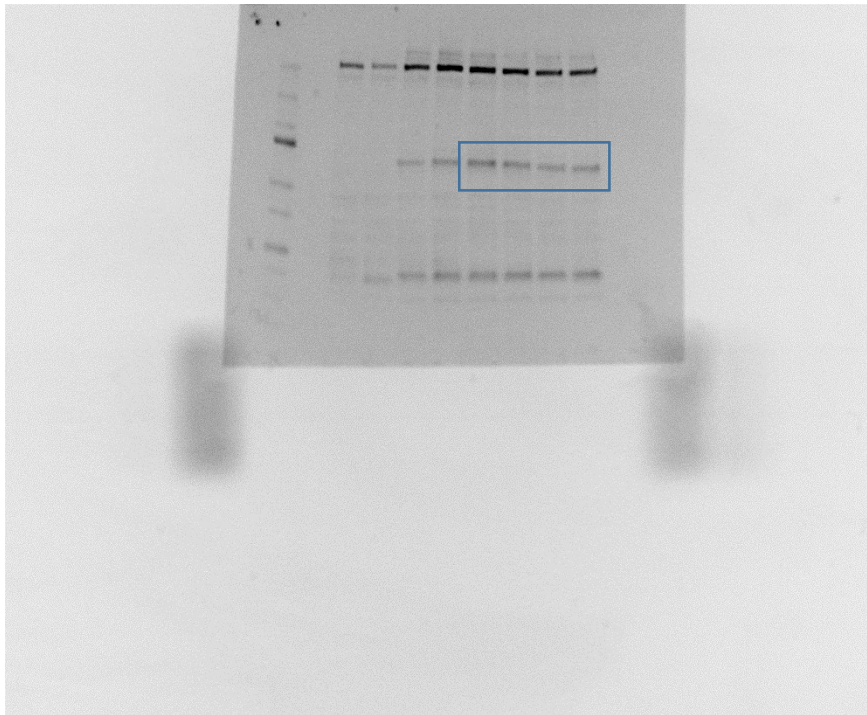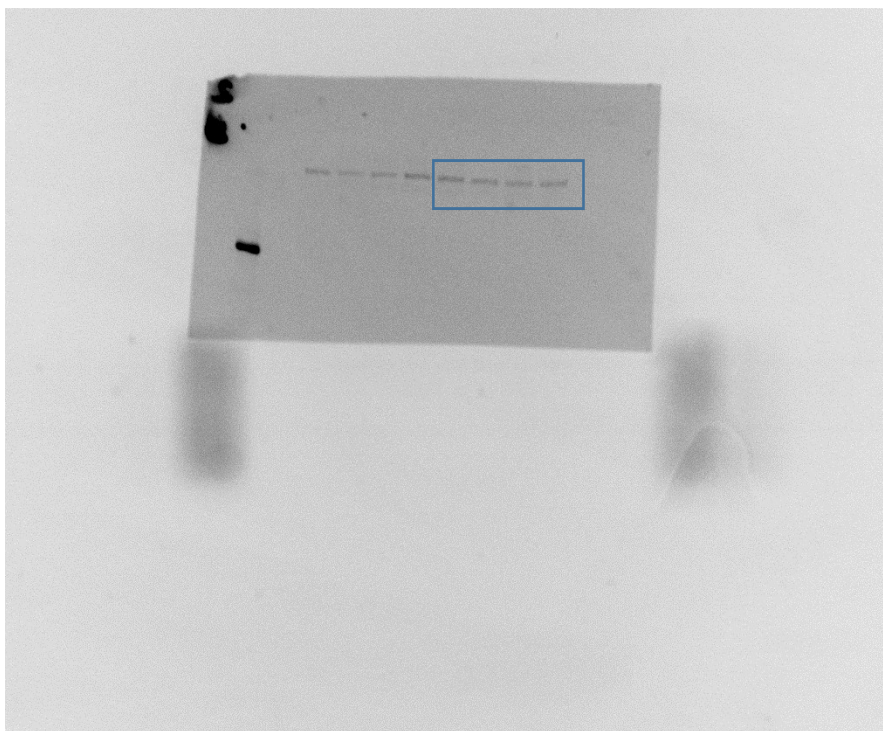

**Phospho (above) and Total (below) P70S6K Participant 3**

Lane 5 – WPH FAST

Lane 6 – WPH Fed

Lane 7 – NEAA FAST

Lane 8 – NEAA Fed

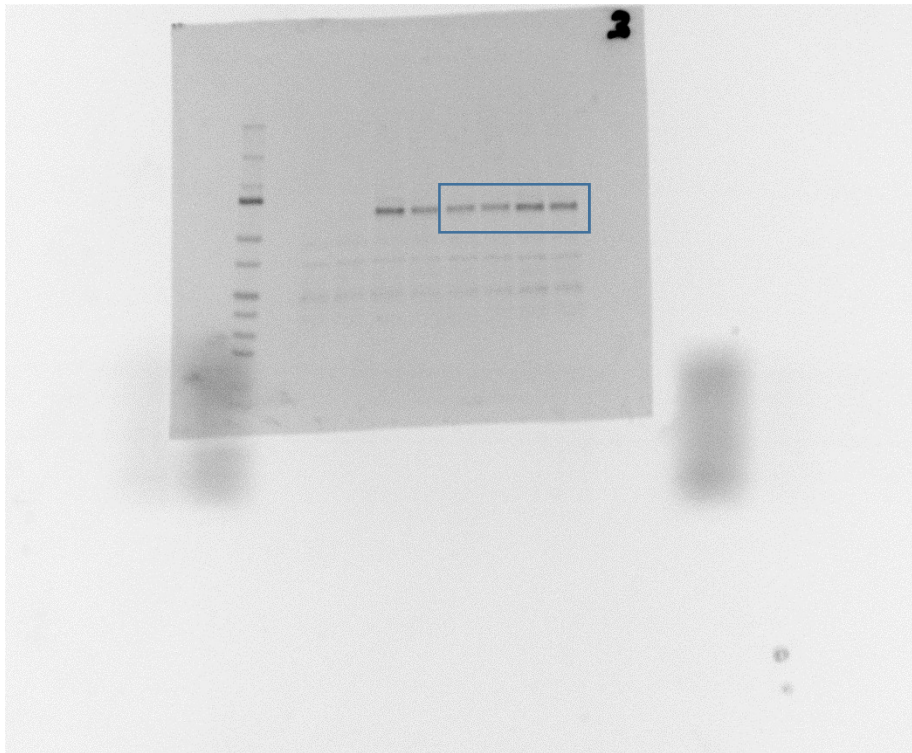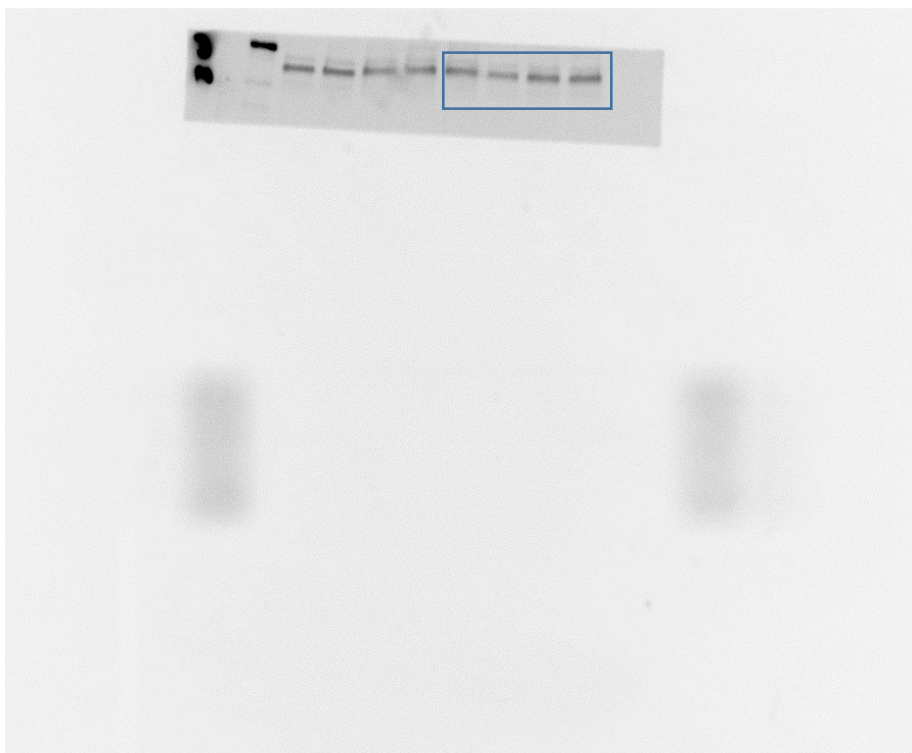

**Phospho (above) and Total (below) P70S6K Participant 4**

Lane 5 – WPH FAST

Lane 6 – WPH Fed

Lane 7 – NEAA FAST

Lane 8 – NEAA Fed

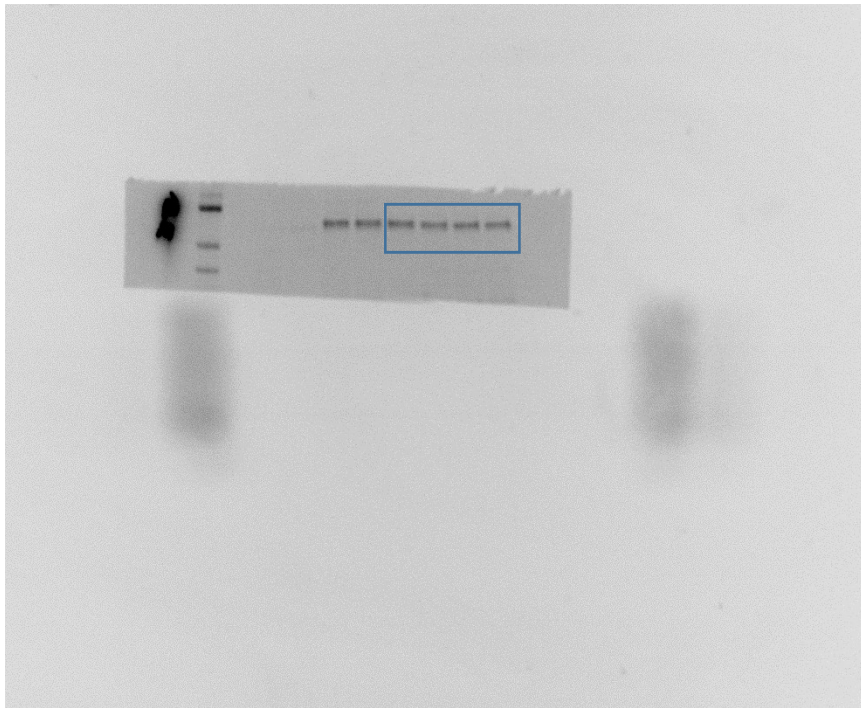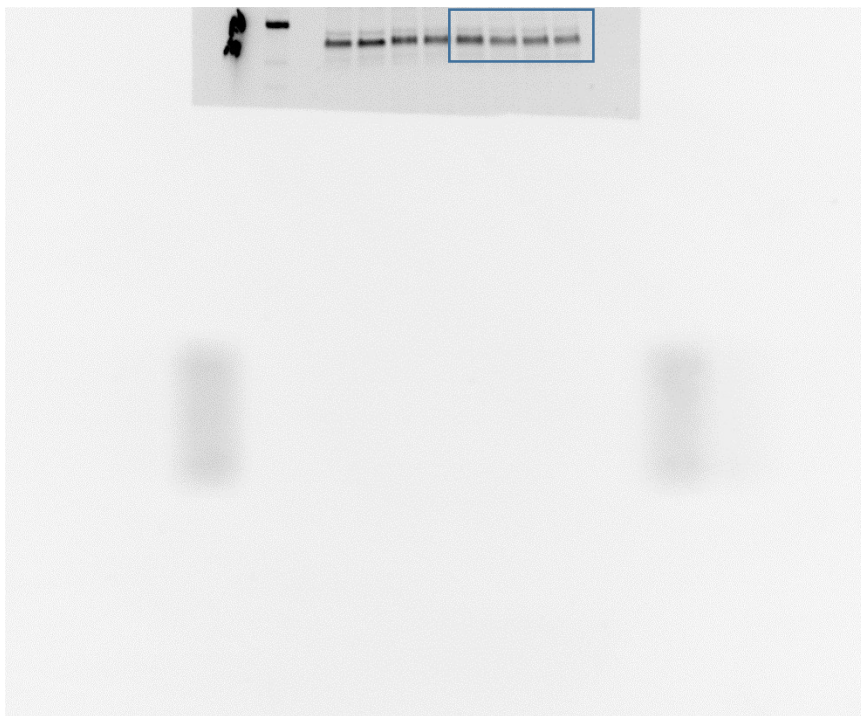

**Phospho (above) and Total (below) P70S6K Participant 5**

Lane 5 – WPH FAST

Lane 6 – WPH Fed

Lane 7 – NEAA FAST

Lane 8 – NEAA Fed



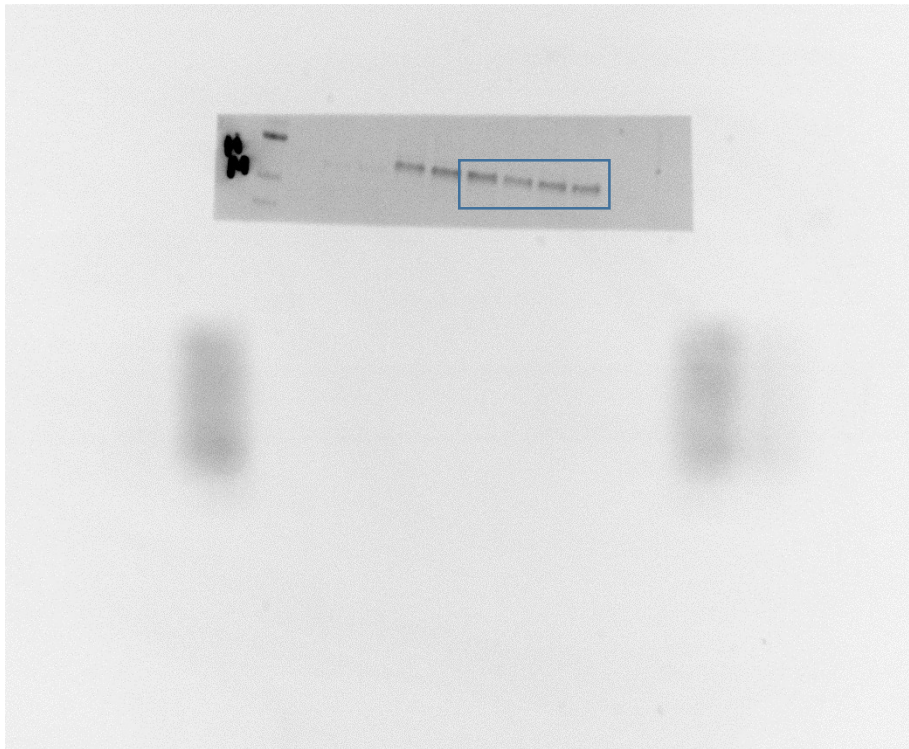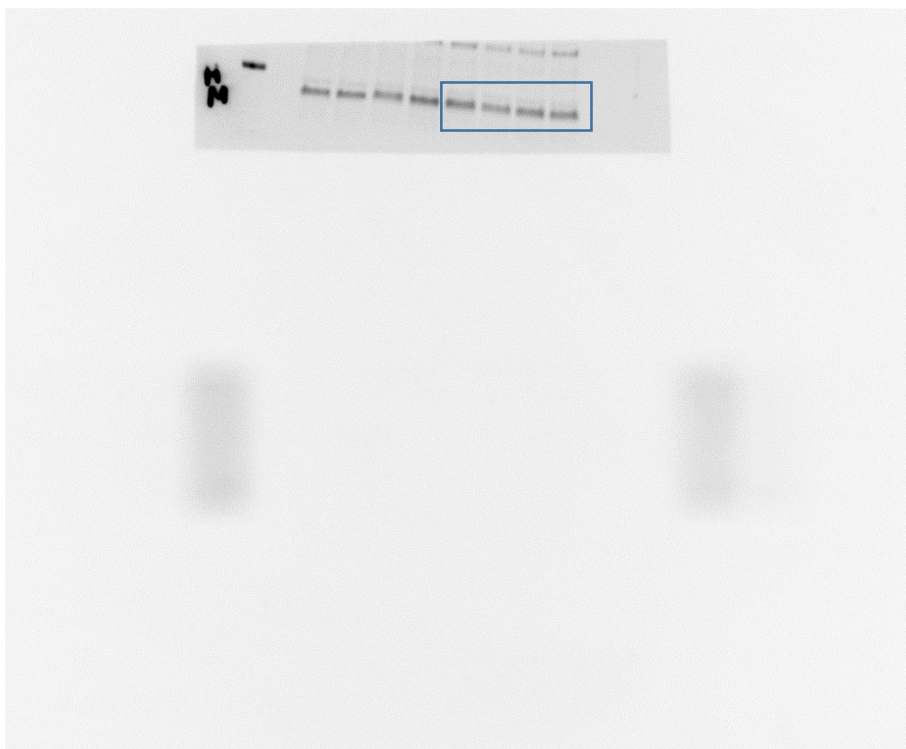

**Phospho (above) and Total (below) P70S6K Participant 6**

Lane 5 – WPH FAST

Lane 6 – WPH Fed

Lane 7 – NEAA FAST

Lane 8 – NEAA Fed

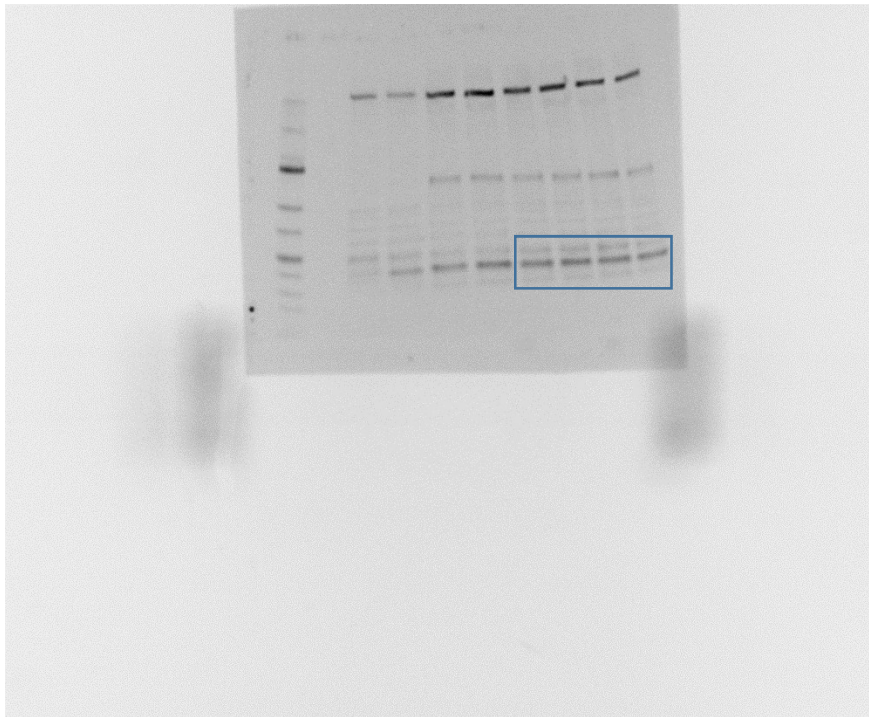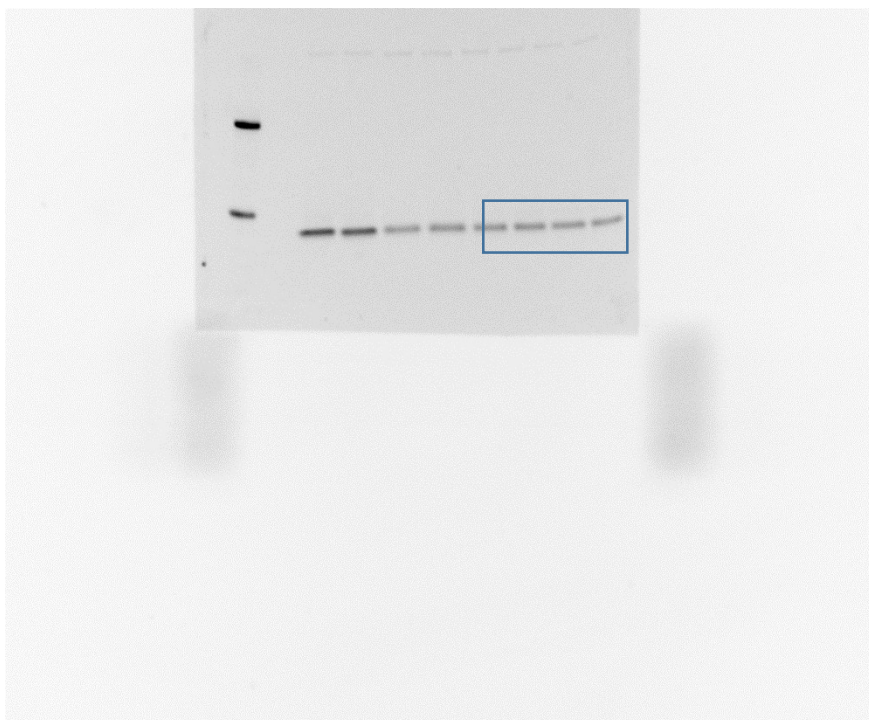

**Phospho (above) and Total (below) 4E-BP1 Participant 1**

Lane 5 – WPH FAST

Lane 6 – WPH Fed

Lane 7 – NEAA FAST

Lane 8 – NEAA Fed

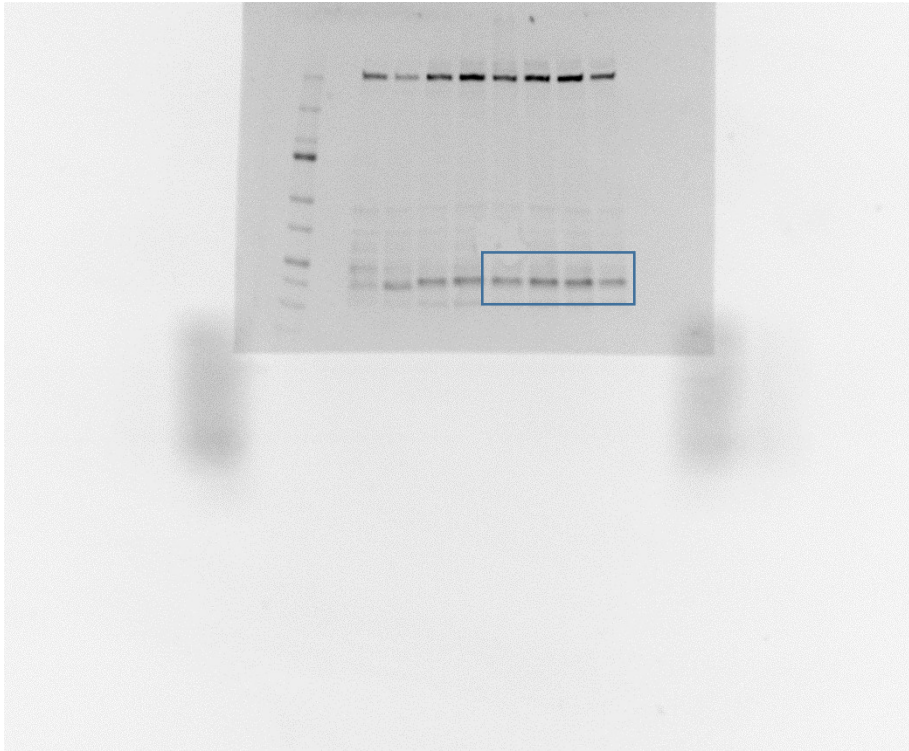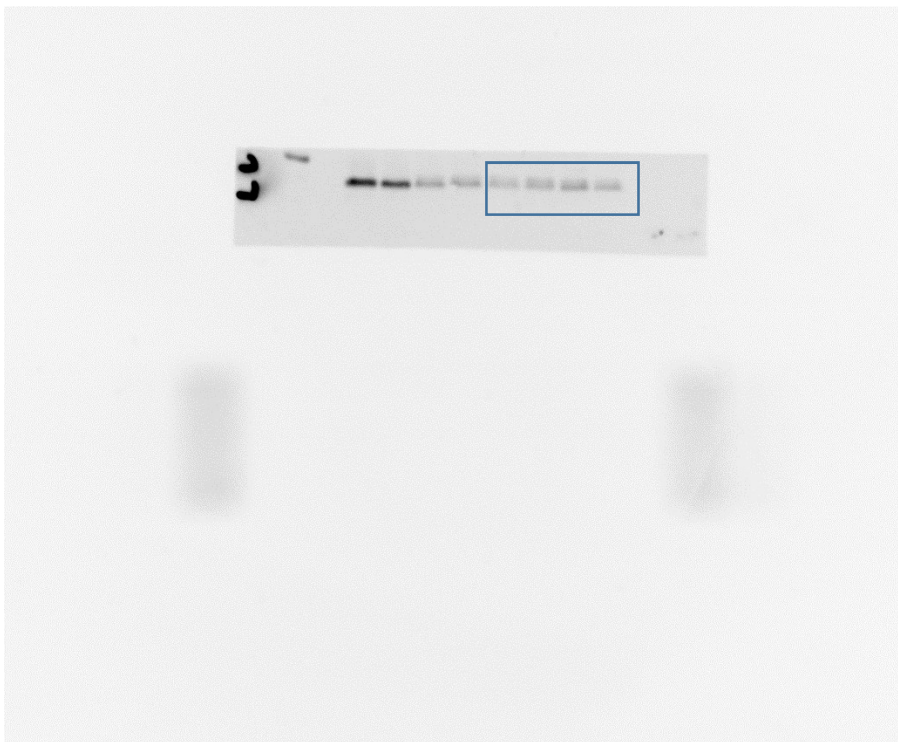

**Phospho (above) and Total (below) 4E-BP1 Participant 2**

Lane 5 – WPH FAST

Lane 6 – WPH Fed

Lane 7 – NEAA FAST

Lane 8 – NEAA Fed

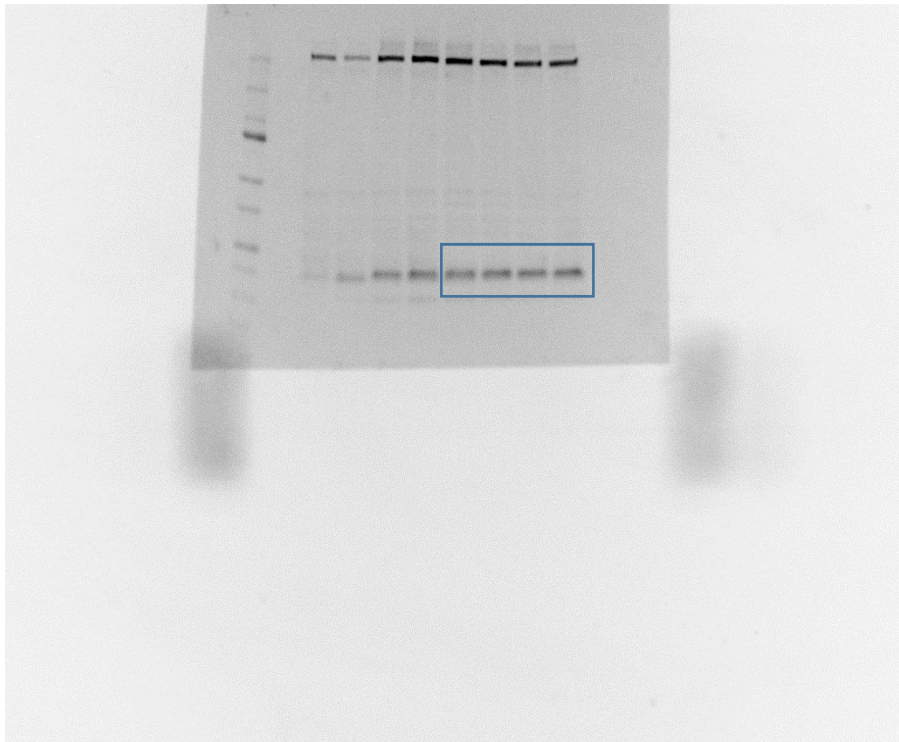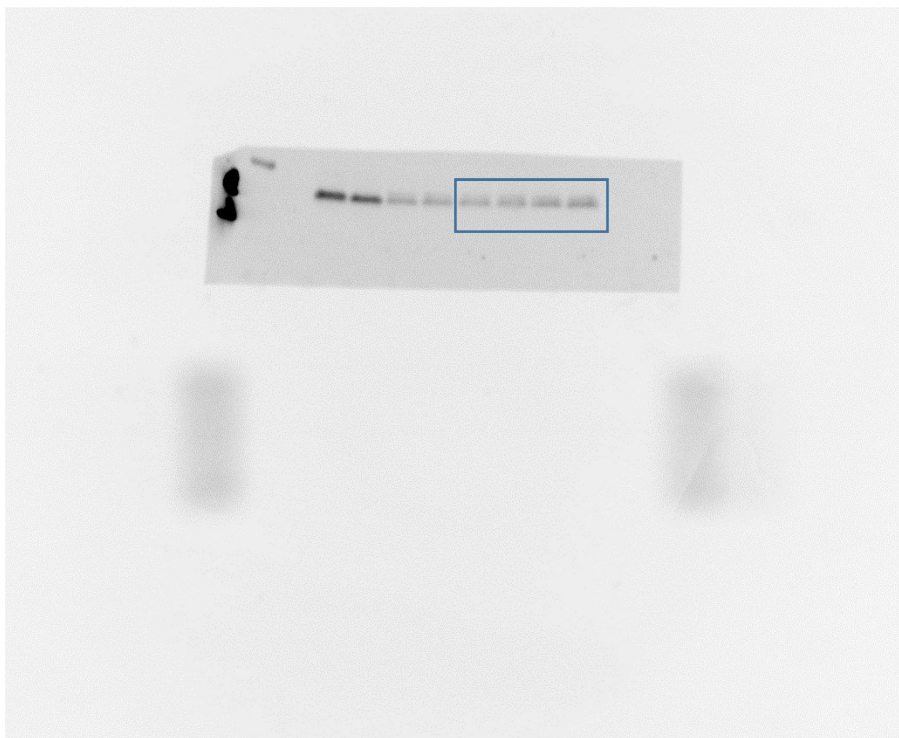

**Phospho (above) and Total (below) 4E-BP1 Participant 3**

Lane 5 – WPH FAST

Lane 6 – WPH Fed

Lane 7 – NEAA FAST

Lane 8 – NEAA Fed

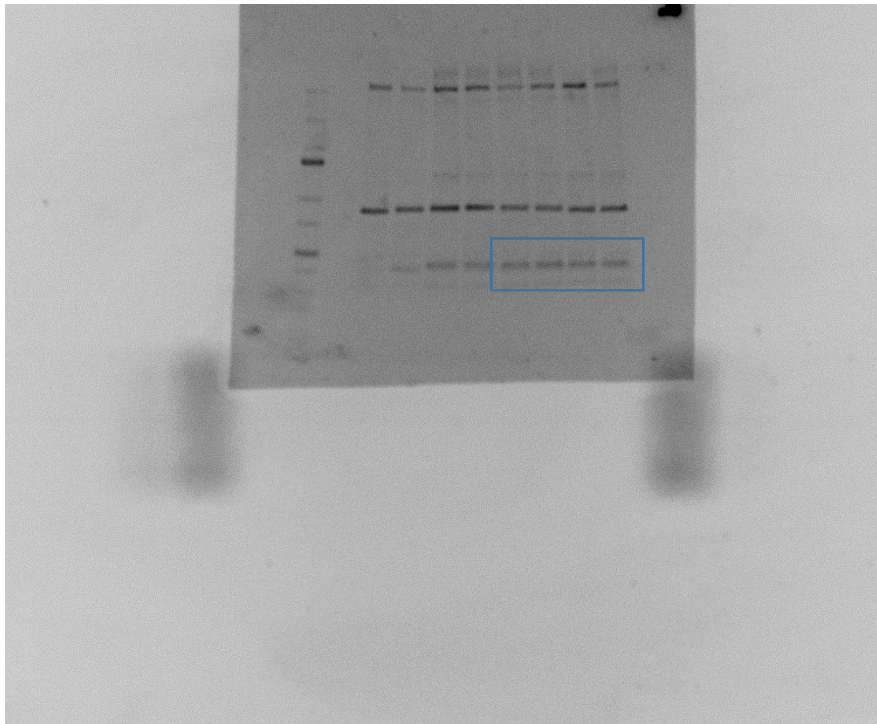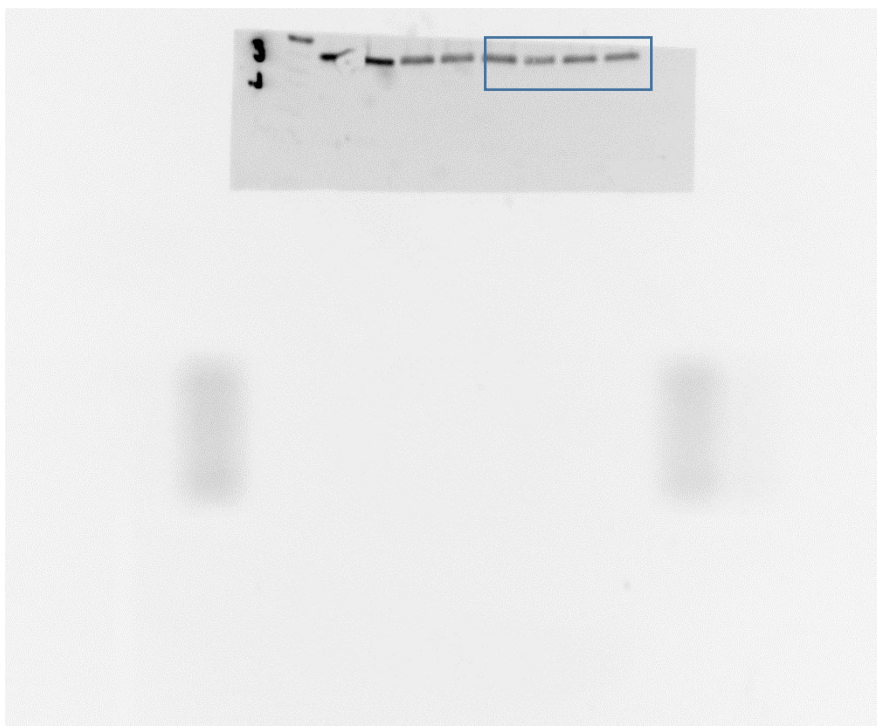

**Phospho (above) and Total (below) 4E-BP1 Participant 4**

Lane 5 – WPH FAST

Lane 6 – WPH Fed

Lane 7 – NEAA FAST

Lane 8 – NEAA Fed

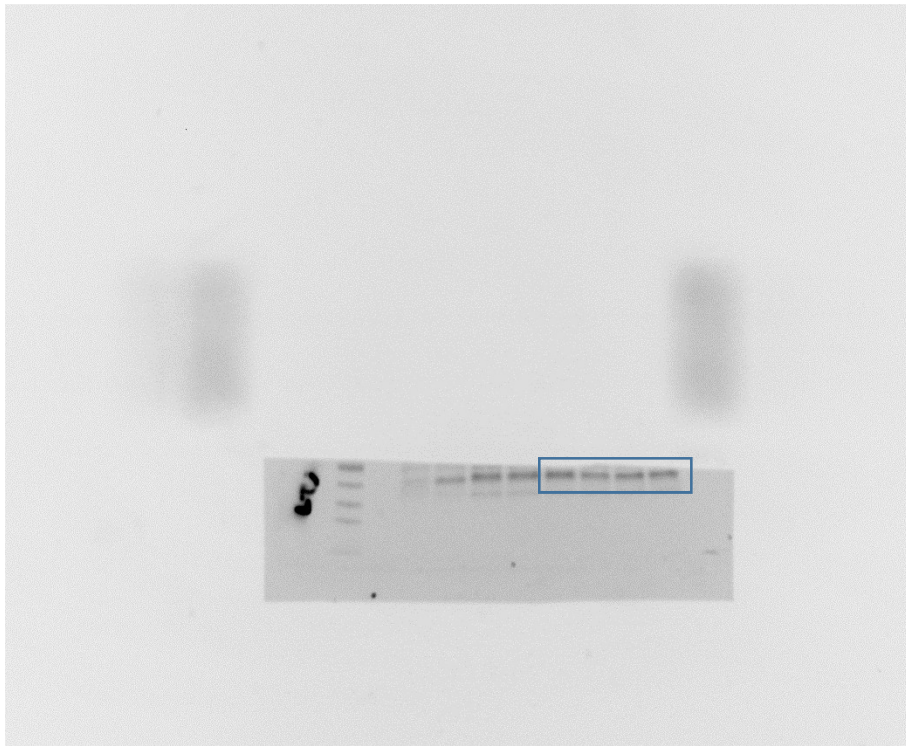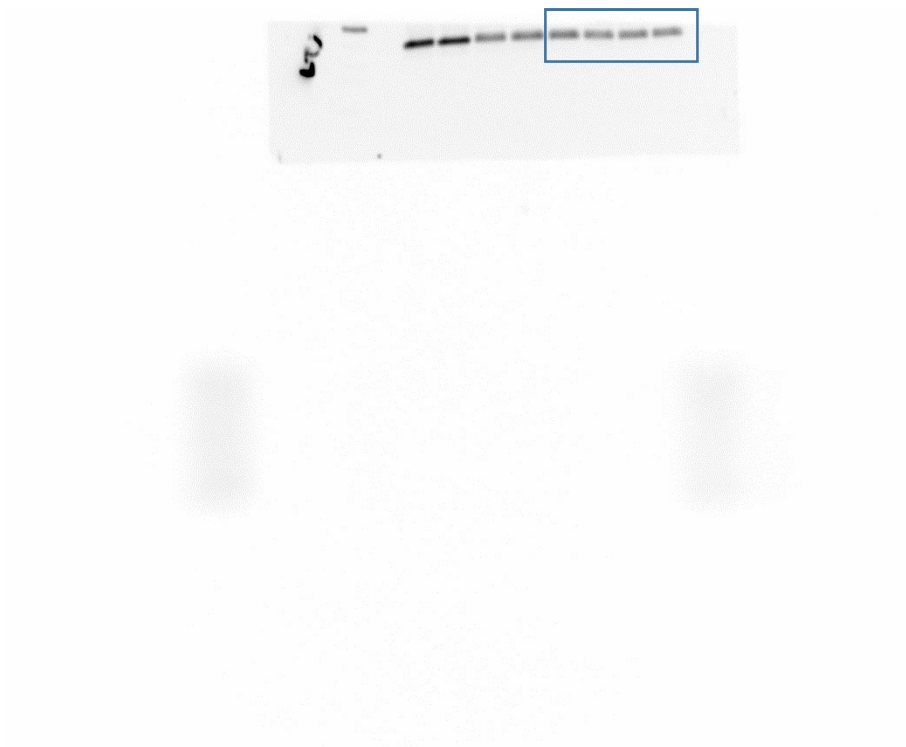

**Phospho (above) and Total (below) 4E-BP1 Participant 5**

Lane 5 – WPH FAST

Lane 6 – WPH Fed

Lane 7 – NEAA FAST

Lane 8 – NEAA Fed

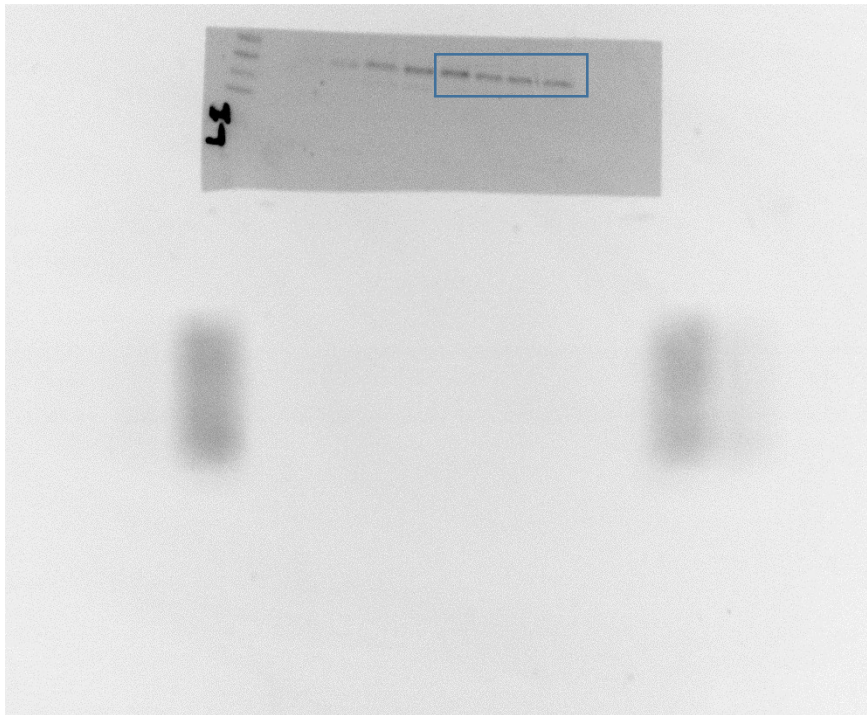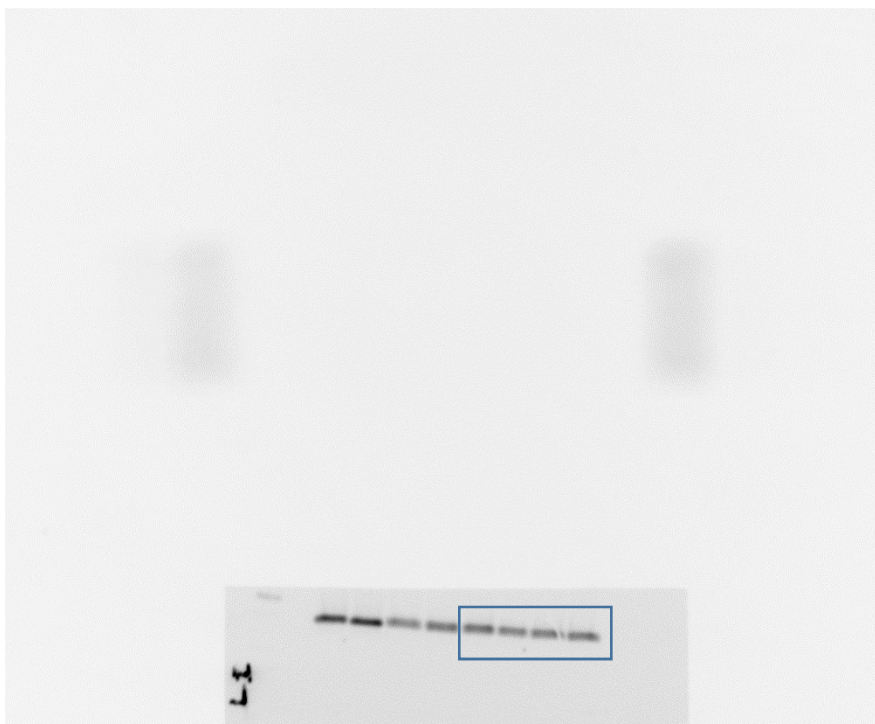

**Phospho (above) and Total (below) 4E-BP1 Participant 6**

Lane 5 – WPH FAST

Lane 6 – WPH Fed

Lane 7 – NEAA FAST

Lane 8 – NEAA Fed
